# Supplementary material for: A short splicing isoform of HBS1L links the cytoplasmic exosome and SKI complexes in humans
Source: PubMed Central journal article supplement — Nucleic Acids Res. 2016 Sep 26;45(4):2068–80. doi: 10.1093/nar/gkw862 (PMC5389692; doi:10.1093/nar/gkw862), 2016-09-26
Supplement: gkw862_Supp.pdf [file gkw862_Supp.pdf]

1  
2  
3 Dear Dr Corey,  
4

5 Thank you very much for giving us the opportunity to resubmit our manuscript. Considering the enthusiastic  
6 feedback we received in the first review round, we are very surprised to see such a negative opinion on the  
7 revised version of the manuscript from Reviewer 3, especially since we have responded to basically all the  
8 points raised by the Reviewers. We would like to take an opportunity to rebut some of the new criticism and  
9 only slightly modify the manuscript in order to accommodate the point raised by Reviewer 2, without  
10 conducting further experiments. Since Reviewer 3 has changed his recommendation, we kindly ask you to  
11 balance your judgment.  
12  
13  
14  
15  
16  
17

18  
19 Point by point response:  
20  
21  
22  
23  
24

25 **Referee: 2**  
26  
27  
28

29 Comments for the Authors  
30

31 The authors have addressed most of the previous reviewer comments, either by revising their descriptions  
32 of the data, reanalyzing their data, or by inclusion of additional data, all of which strengthen the manuscript.  
33 Although I am unaware of NAR policies regarding citation of manuscripts published during the time a paper  
34 is under review, it might benefit the authors to include a structural comparison to the recent x-ray structure  
35 of yeast Ski7 bound to the exosome core (Mol Cell. 2016 Jul 7;63(1):125-34. doi:  
36 10.1016/j.molcel.2016.05.028. Epub 2016 Jun 23) to better substantiate their model or to tell the reader how  
37 it differs. Also to perhaps reference the direct pull down experiment using the human core and C-terminal  
38 domain of HBS1LV3.  
39  
40  
41  
42  
43

44 Done  
45  
46  
47  
48  
49  
50  
51  
52  
53  
54  
55  
56  
57  
58  
59  
60

**Referee: 3**

## Comments for the Authors

In this revised manuscript, Kalisiak et al. have responded to all comments in my first review. I am sorry to say that I am still unhappy with the evidence supporting the two main claims of the paper.

1. The authors claim that HBS1LV3 plays the role that Ski7 has in yeast cells, mediating complex formation between the SKI2/3/8 complex and the cytoplasmic exosome. I asked the authors to support this claim by an experiment showing a diminished interaction between the two complexes upon knock-down of HBS1LV3. They attempted to do this by co-sedimentation (Fig. 4 and Fig. S3).

This was one of the methods the Reviewer 3 suggested in the first round of revision. “Direct evidence for the connecting role of HBS1LV3 would be provided if they demonstrated that this co-purification is diminished upon knock-down of HBS1LV3 (IP or, for example, co-sedimentation).”

Unfortunately, the SKI complex and the exosome predominantly sediment as distinct complexes. There is some overlap of the two in fractions lower in the gradient, but a characteristic peak indicating the existence of a stable complex is not visible. As a result, the knock-down of HBS1LV3 cannot produce a striking effect.

I agree with the authors that the amounts of the SKI complex and the exosome in the overlapping fractions tends to be reduced in the knock-down, but the experiment certainly does not provide persuasive evidence for HBS1LV3 mediating an interaction.

We respectfully disagree with this comment. Indeed, our results do not substantiate a claim that HBS1LV3 connects SKI and the exosome into a stable supercomplex that dominates the individual complexes in terms of abundance and the Reviewer’s argument is quite sound. However, this is not the claim we make. Our interpretation is that, as in yeast, SKI/exosome interaction is a transient one and only involves a small fraction of both complexes at any given time. Maybe this was not written clearly enough in the manuscript. We apologize for the confusion. We have modified the manuscript to make this more clear. Transient nature of SKI/exosome interaction is consistent with a small overlap in co-sedimentation patterns (rather than a clear peak) that is diminished upon HBS1LV3 depletion and as such we consider our data quite convincing.

Moreover, our hypothesis that HBS1LV3 is directly involved in SKI/exosome supercomplex formation, is further supported by the fact that upon depletion of HBS1LV1, the fractions of DIS3L and SKI2W co-migrating as higher molecular weight species were greatly increased, which suggests HBS1LV1 and HBS1LV3 compete for SKI complex binding.

1  
2  
3 The idea of HBS1LV3 promoting the interaction between the SKI complex and the exosome came from IPs  
4 of DIS3L and RRP4 in which the relevant proteins were detected by MS analysis. It would seem natural to  
5 repeat this type of experiment under conditions of HBS1LV3 depletion.  
6  
7

8 We agree with the Reviewer that such experiments would give more weight to our statement. However,  
9 quantitative MS experiments combined with siRNA silencing require several replicates in order to achieve  
10 statistically significant results, which makes them time-consuming and costly. Also, since siRNA-mediated  
11 depletion of proteins is hardly ever complete and a fraction can always remain, such an experiment bears a  
12 high risk of failure. Considering these difficulties and our successful co-sedimentation experiments, we  
13 decided to forgo the MS approach.  
14  
15  
16  
17

18 Finally, the interaction of HBS1LV3 with the exosome was recently described:

19 (Mol Cell. 2016 Jul 7;63(1):125-34. doi: 10.1016/j.molcel.2016.05.028. Epub 2016 Jun 23).  
20  
21  
22

23 We believe structural studies on human exosome/SKI supercomplex will fully explain the mechanistic role  
24 of the HBS1LV3 in the near future.  
25  
26  
27

28 2. I have previously criticized the RNA stability experiments. Although the authors have deleted the  
29 exaggerated numbers they previously provided for changes in mRNA half-lives observed upon HBS1LV3  
30 depletion, the underlying data have not changed.  
31  
32

33 Having read the reviews, we were under the impression that the criticism concerned the way the data were  
34 analyzed and have recalculated our data according to both Reviewers' suggestions.  
35  
36  
37

38 They selected the three mRNAs that appeared most strongly affected in their transcriptome-wide analysis.  
39 Of these, only the NOSIP RNA fully supports a role of HBS1LV3 in mRNA decay: Its steady-state level is  
40 increased, the effect is fully reverted by expression of siRNA-resistant message (Fig. S9B), and an increased  
41 half-life is beautifully confirmed by qPCR and northern (Fig. 7E, F).  
42  
43  
44

45 We welcome the Reviewer's comment for appreciation of our data.  
46

47 The only fly in the ointment is that a stabilization by 5.5fold (Fig. S10B) does not match a 2.5fold increase  
48 in steady-state levels.  
49  
50

51 We admit the increase in steady-state levels does not exactly correspond to the obtained half-lives. It should  
52 be stressed however that these results come from two different experiments, one involving actinomycin D  
53 treatment, and as such some discrepancies might be expected.  
54  
55  
56  
57  
58  
59  
60

1  
2  
3 However, stabilization of the TNFRSR12A message is near marginal.  
4

5 We consider a 2.4-fold stabilization upon HBS1LV3 knock-down to be rather substantial.  
6

7 Both this mRNA and the third tested, TRAPPC2L, are not or barely stabilized by a SKI2 knockdown,  
8 suggesting the possibility that the small effect of the HBS1LV3 knock-down is not related to the SKI  
9 complex.  
10

11 True, the effect of SKI2W depletion is weaker than that of HBS1LV3, the latter being in agreement with  
12 RNA-seq results. We believe this is because the HBS1LV3 is much less abundant in the cell than the  
13 SKI2W, which makes it easier to obtain a phenotype, even with incomplete depletion of the protein (again,  
14 gene silencing by RNAi is hardly ever perfect). If the cell maintains substantial levels of HBS1LV3 but has  
15 SKI2W to spare, such a result can be expected. Of course, why this would affect different mRNAs  
16 differently is another matter. The change in half-lives of TNFRSF12A, though modest, is statistically  
17 significant for both silenced genes, as is the stabilization of TRAPPC2L upon HBS1LV3 depletion.  
18  
19

20 Also, one can imagine that HBS1LV3 has a SKI complex-independent role in RNA decay, however, in light  
21 of all the literature this is highly unlikely. We have considered this possibility in the revised manuscript.  
22  
23

24 For both RNAs, the increase in steady-state RNA is only partially reversed by expression of RNAi-resistant  
25 HBS1LV3.  
26  
27

28 We agree that the rescue phenotype is not complete. This is, unfortunately, a common occurrence with this  
29 type of experiment and one that is not easily remedied. One solution would be using knock-out cell lines  
30 and rescue alleles to eliminate RNAi.  
31  
32

33 At the time we started our work the CRISPR methodology was not yet established. To obtain proper  
34 isoform-specific knock-out cell lines and repeat all the relevant experiments would not be feasible in the  
35 revision timeframe.  
36  
37

38 As I stated in my first review, the weakness of the knock-down effects may simply be due to 5' decay playing  
39 a dominant role in mRNA degradation.  
40  
41

42 The relative contributions of 5'-3' and 3'-5' decay pathways to mRNA turnover in mammalian cells is an  
43 unresolved issue and we agree that it is an important one. It has been convincingly shown that the 5'-3'  
44 pathway is dominant in yeast but data on human cells are scarce.  
45  
46

47 We have never stated in the manuscript that exosome-mediated 3'-5' decay is more prominent than 5'-3'  
48 pathway. As we indicated in the previous round of revision, we believe that such studies are not within the  
49 scope of this manuscript, where we focus of functional characterization of HBS1LV3 rather than  
50 quantitative analysis of RNA decay pathways.  
51  
52  
53  
54  
55  
56  
57  
58  
59  
60

1  
2  
3 If so, weakening 5' decay by a suitable knock-down might help. Perhaps the authors could also use the viral  
4 sequence inhibiting XRN1, which I believe was described by the Wilusz lab.  
5  
6

7 Adding XRN1 knock down to these experiments would be difficult for several reasons. Firstly, depletion of  
8 XRN1 on its own is particularly detrimental to cells. Secondly, multiple knockdowns are usually less  
9 efficient than individual ones. Thirdly, impairing both major RNA decay pathways runs the risk of damaging  
10 the cell's RNAi capabilities.  
11  
12  
13  
14  
15  
16  
17  
18  
19  
20  
21  
22  
23  
24  
25  
26  
27  
28  
29  
30  
31  
32  
33  
34  
35  
36  
37  
38  
39  
40  
41  
42  
43  
44  
45  
46  
47  
48  
49  
50  
51  
52  
53  
54  
55  
56  
57  
58  
59  
60

1  
2  
3 **A short splicing isoform of HBS1L links the cytoplasmic exosome and SKI complexes in**  
4  
5 **humans**  
6

7 Katarzyna Kalisiak<sup>1,2</sup>, Tomasz M. Kuliński<sup>1,2</sup>, Rafał Tomecki<sup>1,2</sup>, Dominik Cysewski<sup>1,2</sup>,  
8 Zbigniew Pietras<sup>1,2,3</sup>, Aleksander Chlebowski<sup>1,2</sup>, Katarzyna Kowalska<sup>1,2</sup>, Andrzej  
9 Dziembowski<sup>1,2,\*</sup>  
10  
11  
12  
13  
14  
15  
16  
17

18 <sup>1</sup>Laboratory of RNA Biology and Functional Genomics, Institute of Biochemistry and  
19 Biophysics, Polish Academy of Sciences, Pawinskiego 5a, 02-106 Warsaw, Poland;  
20  
21

22 <sup>2</sup>Institute of Genetics and Biotechnology, Faculty of Biology, University of Warsaw,  
23 Pawinskiego 5a, 02-106 Warsaw, Poland;  
24  
25  
26

27 <sup>3</sup>International Institute of Molecular and Cell Biology in Warsaw, Ks. Trojdena 4, 02-109  
28 Warsaw, Poland  
29  
30  
31  
32

33  
34  
35  
36 \*To whom correspondence should be addressed.  
37

38  
39 Tel: (48-22)5922033; Fax: (48-22)6584176; E-mail: [andrzejd@ibb.waw.pl](mailto:andrzejd@ibb.waw.pl)  
40  
41  
42

43  
44 Key words: RNA exosome, SKI complex, RNA decay, HBS1L, HBS1LV3  
45  
46  
47  
48  
49  
50  
51  
52  
53  
54  
55  
56  
57  
58  
59  
60

**Abstract**

The exosome complex is a major eukaryotic exoribonuclease that requires the SKI complex for its activity in the cytoplasm. In yeast, the Ski7 protein links both complexes, whereas a functional equivalent of the Ski7 has remained unknown in the human genome.

Proteomic analysis revealed that a previously uncharacterized short splicing isoform of *HBS1L* (*HBS1LV3*) is the long-sought factor linking the exosome and SKI complexes in humans. In contrast, the canonical *HBS1L* variant, *HBS1LV1*, which acts as a ribosome dissociation factor, does not associate with the exosome and instead interacts with the mRNA surveillance factor PELOTA. Interestingly, both *HBS1LV1* and *HBS1LV3* interact with the SKI complex and *HBS1LV1* seems to antagonize SKI/exosome supercomplex formation. *HBS1LV3* contains a unique C-terminal region of unknown structure, with a conserved RxxxFxxxL motif responsible for exosome binding and may interact with the exosome core subunit RRP43 in a way that resembles the association between Rrp6 RNase and Rrp43 in yeast. *HBS1LV3* or the SKI complex helicase (*SKI2W*) depletion similarly affected the transcriptome, deregulating multiple genes. Furthermore, half-lives of representative upregulated mRNAs were increased, supporting the involvement of *HBS1LV3* and *SKI2W* in the same mRNA degradation pathway, essential for transcriptome homeostasis in the cytoplasm.



## Introduction

Messenger RNA (mRNA) molecules exist largely to produce proteins. Since steady-state mRNA levels are determined by the rates of synthesis and decay, cytoplasmic degradation of mRNA plays a fundamental role in the regulation of gene expression.

Multiple enzymes, particularly nucleases, participate in eukaryotic mRNA decay. Nucleases **involved in** 3'-5' cytoplasmic mRNA degradation pathways can act individually (e.g., **the** DIS3L2 protein) (1, 2), or be constituents of multisubunit complexes. The exosome is a major multisubunit nuclease that catalyses the 3'-5' degradation of RNA in both the nucleus and the cytoplasm (3, 4).

The exosome comprises a nine-subunit, ring-shaped, catalytically inactive core, which associates with one (EXOSC10 [RRP6] or DIS3 or DIS3L) or two (EXOSC10 and DIS3) 3'-5' exoribonucleases (5, 6). Several functional isoforms of the exosome are found in human cells (7) – each has distinct catalytic subunits and occupies a different intracellular location. The ten-subunit isoform encompassing the ring and only one nuclease – the EXOSC10 protein – is localized in the nucleoli. Meanwhile, the eleven-subunit exosome complex has a nucleoplasmic localization and consists of the ring, EXOSC10 and an additional nuclease, DIS3. However, a small fraction of complexes associated with DIS3 and EXOSC10 proteins can also be found in the cytoplasm. The main cytoplasmic isoform containing a DIS3 paralogue, the DIS3-like protein (DIS3L), participates in 3'-5' mRNA degradation in the cytoplasmic compartment (1, 5).

The substrates of exosome complexes containing DIS3L or DIS3 pass through the central channel of the exosome ring to reach the exoribonuclease active site (8–12). Although the exosome complex **efficiently** degrades both single-stranded and partially double-stranded RNA substrates *in vitro*, studies in yeast showed that cooperation between the exosome and

1  
2  
3 the SKI complex is indispensable for efficient cytoplasmic mRNA decay *in vivo* (13–15). The  
4  
5 yeast SKI complex was initially identified as being essential for degradation of virus-like  
6  
7 particles (16) and was since characterized as a hetero-tetramer composed of Ski2, Ski3 and  
8  
9 two copies of the Ski8 protein. Through its helicase activity, Ski2 is the catalytic subunit of  
10  
11 the SKI complex and forms part of the structure that contains the central channel. Ski3 and  
12  
13 Ski8 are RNA-binding proteins that have regulatory functions (17). RNA substrates are  
14  
15 delivered through the SKI complex structure directly to the central channel of the exosome  
16  
17 ring (17).  
18  
19

20  
21 Our current knowledge about the SKI complex in humans is very limited. The human  
22  
23 orthologues of yeast *SKI2*, *SKI3* and *SKI8* genes are *SKIV2L*, *TTC37* and *WDR61*,  
24  
25 respectively (18). Mutations in *TTC37* and *SKIV2L* cause the extremely rare congenital bowel  
26  
27 disorder known as trichohepatoenteric syndrome (19, 20). Moreover, the product of the  
28  
29 *SKIV2L* gene (the SKI2W protein) is an important contributor to the regulation of the innate  
30  
31 immune response, which detects foreign nucleic acids (21). Despite the association between  
32  
33 the SKI complex and genetic diseases, the exosome/SKI-dependent RNA decay pathways and  
34  
35 RNA substrates that are targeted by this supercomplex have not been extensively studied in  
36  
37 human cells. In particular, little is known about the mechanism that ensures the physical  
38  
39 interaction between the human SKI and exosome complexes.  
40  
41  
42

43  
44 The yeast SKI complex interacts with the exosome via the auxiliary Ski7 protein,  
45  
46 which is an integral component of the cytoplasmic exosome isoform (14, 22, 23). The  
47  
48 phenotype of *SKI7* deletion mutants is indistinguishable from that resulting from deletion of  
49  
50 genes encoding SKI complex subunits, and leads to inactivation of cytoplasmic exosome-  
51  
52 dependent mRNA turnover and quality control pathways as well as to elevated copy numbers  
53  
54 of yeast virus-like particles (13, 16, 24, 25). Yeast Ski7 contains domains that share homology  
55  
56 with the Hbs1, a GTPase that interacts with Dom34 (PELOTA in humans). This two-subunit  
57  
58  
59  
60

1  
2  
3 complex, structurally similar to eRF3-eRF1, is responsible for dissociation of stalled  
4  
5 ribosomes (26). Hbs1 is also a ribosomal surveillance factor, involved in no-go and non-stop  
6  
7 mRNA decay (26, 27). Due to structural differences between the N-terminal regions of yeast  
8  
9 Ski7 and Hbs1 proteins, only Ski7 interacts with the exosome core (14), whereas Hbs1  
10  
11 participates in translation-dependent RNA quality control pathways in *Saccharomyces*  
12  
13 *cerevisiae* (28).  
14

15  
16  
17 Since it was thought that no apparent orthologue of the yeast Ski7 protein is encoded  
18  
19 in the human genome, the mechanism of cooperation between the SKI and exosome  
20  
21 complexes in human cells remained unclear. Here we show that a protein encoded by a short  
22  
23 splicing isoform of *HBS1L* that contains a specific new region links the SKI complex with the  
24  
25 exosome, thus functioning as a Ski7 analogue in humans.  
26  
27  
28  
29  
30

## 31 **Materials and methods**

### 32 33 34 35 36 37 **Cell culture**

38  
39 HEK293 Flp-In T-REx and derived stable cell lines were grown in cell culture dishes in  
40  
41 Dulbecco's modified Eagle's medium (DMEM; Gibco) supplemented with 10% fetal bovine  
42  
43 serum (FBS; Gibco) at 37°C in a humidified 5% CO<sub>2</sub> atmosphere.  
44  
45  
46  
47  
48

### 49 50 **Generation of stable cell lines**

51  
52  
53 Stable inducible cell lines producing proteins of interest were obtained using the Flp-In T-  
54  
55 REX system (Invitrogen) according to the manufacturer's instructions.  
56  
57  
58  
59  
60

### siRNA transfection

siRNA-mediated knockdowns were performed using siRNA (Eurogentec) and Lipofectamine RNAiMAX Reagent (Invitrogen) according to the manufacturer's instructions. Test and negative control siRNA molecules were used at a final concentration of 25 nM. To induce production of exogenous protein variants, cells were grown in the presence of doxycycline for an additional 48 h before harvesting.

The siRNA sequences that specifically target endogenous *HBSIL*, *HBSILV3* and *SKIV2L* mRNA are listed below. siRNA oligonucleotide sequences against *HBSILV1*, *SKIV2L* and scrambled siRNA were described previously (29, 30). siRNA oligonucleotides against *HBSILV3* were designed by Eurogentec.

siRNAs:

|                         |                                   |
|-------------------------|-----------------------------------|
| <i>HBSILV1</i> siRNA    | 5'-r(CCAGUAGAUUCCCAGACA)d(TT)-3'  |
| #1 <i>SKIV2L</i> siRNA  | 5'-r(GGAGAUAGACUUUGAGAAA)d(TT)-3' |
| #2 <i>SKIV2L</i> siRNA  | 5'-r(GCCUUAGCUGUAUGUUGGA)d(TT)-3' |
| #1 <i>HBSILV3</i> siRNA | 5'-r(CCUGUCACAAUUAGCAAAU)d(TT)-3' |
| #2 <i>HBSILV3</i> siRNA | 5'-r(GUCAUUGGCAUUUCAUAAA)d(TT)-3' |
| #3 <i>HBSILV3</i> siRNA | 5'-r(GGCAUUUCAUAAAGCUUCU)d(TT)-3' |
| scrambled siRNA         | 5'-r(UUCUUCGAACGUGUCACGU)d(TT)-3' |

We established *HBSILV1* siRNA, #2 *SKIV2L* siRNA and #3 *HBSILV3* siRNA as the most effective, and we used them in all consecutive experiments shown in this study.

## Transient transfection with plasmid vectors, cross-linking and co-immunoprecipitation (Co-IP) assay

For transient transfection, HEK293 Flp-In T-REx cell lines were cultured as previously described and transfected using TransIT-2020 reagent (Mirus) according to the manufacturer's instructions. Cross-linking was performed using **dithiobis[succinimidyl propionate]** (DSP; final conc. 2 mM) (Pierce) according to the manufacturer's protocol.

Immunoprecipitation was based on a previously described method (31) with modifications:

Expression of exogenous genes was induced simultaneously with transient transfection by the addition of tetracycline at a final concentration of 0.1  $\mu\text{g/ml}$ . Following a 48 h incubation, cells were scraped off the plates and pelleted at 400 x g for 3 min. Pellets were resuspended in 0.7 ml lysis buffer (100 mM NaCl; 20 mM HEPES-KOH pH=7.1; 3 mM  $\text{MgCl}_2$ ; 1 mM PMSF; 20 nM pepstatin; 6 nM leupeptin; 2 ng/ml chymostatin; 10% glycerol; 0.5% NP-40) and incubated for 30 min at 4°C in the presence of 0.1 mg/ml RNase A (Sigma-Aldrich). Lysates were then sonicated at 4°C in a BioRuptor sonicator (Diagenode) using 25 pulses of 25 s at setting H (interrupted by 25 s pauses) and centrifuged at 15,000 x g for 15 min at 4°C. Cleared extracts were mixed with 50-100  $\mu\text{l}$  aliquots of magnetic beads (CNBr-activated SepFast Mag4F; Biotoolomics) coated with GFP-trap nanobodies (home-made) (32) freshly washed with lysis buffer and incubated for 1.5 h at 4°C with rotation. Immunoprecipitation was followed by five washes with washing buffer (0.5 M or 0.1 M NaCl; 20 mM HEPES-KOH pH=7.1; 3 mM  $\text{MgCl}_2$ ; 1 mM PMSF; 20 nM pepstatin; 6 nM leupeptin; 2 ng/ml chymostatin; 10% glycerol; 0.5% NP-40) and one wash with lysis buffer (see above). Two methods of protein complex elution and analysis were used: i) Protein complexes were eluted for 5 min at 95°C in SDS sample buffer (64 mM Tris-HCl pH=6.8; 15% 2-mercaptoethanol; 10% glycerol; 2% SDS; 0.1% bromophenol blue) and then analyzed by SDS-PAGE followed by western blot analysis, or ii) Protein complexes were eluted for 10

1  
2  
3 min at 95°C in stripping buffer (50 mM Tris-HCl pH 8.0; 50 mM DTT; 1 mM PMSF; 20 nM  
4  
5 pepstatin; 6 nM leupeptin; 2 ng/ml chymostatin; 10% glycerol, 3% SDS), precipitated using a  
6  
7 standard chloroform-methanol protocol (33) and analyzed by High Resolution Mass  
8  
9 Spectrometry.  
10

### 11 12 13 14 15 **Mass spectrometry analysis**

16  
17 Precipitated proteins were dissolved in 100 µl of 100 mM ammonium bicarbonate buffer,  
18  
19 reduced in 100 mM DTT for 30 min at 57°C, alkylated in 55 mM iodoacetamide for 40 min at  
20  
21 RT in the dark and digested overnight with 10 ng/ml trypsin (Promega) at 37°C. Finally,  
22  
23 trifluoroacetic acid was added at a final concentration of 0.1%. MS analysis was performed by  
24  
25 LC-MS in the Laboratory of Mass Spectrometry (IBB PAS, Warsaw) using a nanoAcquity  
26  
27 UPLC system (Waters) coupled to a LTQ-Orbitrap Velos mass spectrometer (Thermo  
28  
29 Scientific). Peptides were separated by a 180 min linear gradient of 95% solution A (0.1%  
30  
31 formic acid in water) to 35% solution B (acetonitrile and 0.1% formic acid). The  
32  
33 measurement of each sample was preceded by three washing runs to avoid cross-  
34  
35 contamination. The final MS washing run was searched for the presence of cross-  
36  
37 contamination between samples. If the protein of interest was identified in the washing run  
38  
39 and in the next measured sample at the same or smaller intensity, then the sample was treated  
40  
41 as cross-contamination. These samples were excluded from final graphs.  
42  
43  
44  
45

46  
47 The mass spectrometer was operated in the data-dependent MS-MS2 mode, and data  
48  
49 were acquired in the m/z range of 300-2000. Data were analyzed with the Max-Quant  
50  
51 (Version 1.5.3.12) platform. The reference human proteome database from UniProt was used,  
52  
53 and HBS1L protein sequences were removed and replaced with unique sequence fragments of  
54  
55 HBS1LV1 and HBS1LV3. Label-Free-Quantification (LFQ) intensity values were calculated  
56  
57 using the MaxLFQ algorithm. Identified proteins were analyzed as follows. Protein  
58  
59  
60

1  
2  
3 abundance was defined as the signal intensity calculated by MaxQuant software for a protein  
4  
5 (sum of intensities of identified peptides of given protein) divided by its molecular weight.  
6  
7 Specificity was defined as the ratio of the protein LFQ intensity measured in the bait  
8  
9 purification to background level (i.e., protein LFQ intensity in the negative control  
10  
11 purification with the background level arbitrarily set to 1 for proteins not detected in the  
12  
13 negative control). High values of both protein abundance and specificity indicated proteins  
14  
15 that were enriched in the purification, and thus suggested interactions. The exosome, the SKI  
16  
17 complex components and HBS1L proteins are included in the Figure 1A,B,E,F and Figure S1.  
18  
19 Extended data are presented in the Figure S2. Since the HBS1LV1 protein was identified in a  
20  
21 washing run before the HBS1LV3 Co-IP measurement, the HBS1LV1 hit was deemed an  
22  
23 artefact and as such was removed from Figure 1E.  
24  
25  
26  
27  
28

### 29 **Real-Time quantitative PCR (qPCR) validation**

30  
31  
32 RNA for qPCR was isolated from HEK293 Flp-In T-REx cell lines induced with doxycycline  
33  
34 (0.1 µg/ml), using TRI Reagent (Sigma-Aldrich) according to the manufacturer's instructions.  
35  
36 To eliminate genomic DNA, 10 µg of total RNA was treated with 4U TURBO DNase  
37  
38 (Ambion) and incubated at 37°C for 2h. RNA was then extracted using phenol:chloroform  
39  
40 and precipitated with isopropanol. cDNA synthesis was performed using 2 µg of DNase-  
41  
42 treated RNA, 250 ng random hexamers, 50 pmol oligo(dT) primer and 200 U SuperScript III  
43  
44 Reverse Transcriptase (Life Technologies). qPCR reactions were performed according to the  
45  
46 manufacturer's guidelines using 20 ng of the cDNA and a Roche LightCycler 480 system.  
47  
48 Analyses were performed in triplicate. Reactions without reverse transcriptase (negative  
49  
50 controls) were also carried out and showed an insignificant background. The specificity of  
51  
52 each reaction was confirmed by a melting curve analysis. *GAPDH* mRNA was used for  
53  
54  
55  
56  
57  
58  
59  
60

1  
2  
3 normalization. *XIST* and *MALAT1* long non-coding RNAs were used for RNAi normalization  
4  
5 because RNA-seq data showed that their levels were unaffected by HBS1LV3 depletion.  
6

### 7 8 **Bioinformatic analysis**

9  
10 Ribo-depleted total RNA was used to prepare strand-specific libraries (dUTP RNA) that were  
11  
12 subsequently processed using an Illumina HiSeq sequencing platform in the 75-nt pair-end  
13  
14 mode. Experiments were performed in triplicate and reads were mapped to the reference  
15  
16 human genome (hg38) using the STAR short read aligner (version STAR\_2.4.0b) (34).  
17  
18 Quality control, read processing and filtering, visualization of the results and counting of  
19  
20 reads for the Genecode v22 comprehensive annotation were performed using custom scripts  
21  
22 and elements of the RSeQC, BEDtools and SAMtools packages. Differential expression  
23  
24 analyses were performed using the DESeq2 Bioconductor R package (35).  
25  
26  
27  
28  
29  
30  
31

### 32 **Localization studies**

33  
34 Stable cell lines expressing EGFP-tagged HBS1LV1, HBS1LV3 or SKI2W were cultured on  
35  
36 Lab-Tek II Chamber Slides (Thermo Scientific) coated with poly-L-lysine (Sigma-Aldrich),  
37  
38 for 24 h in the presence of tetracycline (0.1 µg/ml). Cells were incubated with nucleic acid  
39  
40 stain Hoechst 33342 (Invitrogen) at a final concentration of 1 µg/ml for 30 min, then washed  
41  
42 two times with PBS and fixed with 3.7% formaldehyde for 30 min at room temperature. Cells  
43  
44 were gently washed three times with PBS and then mounted in ProLong Gold antifade reagent  
45  
46 (Invitrogen). **Laser scanning confocal microscopy imaging** was performed on a FV1000  
47  
48 confocal system (Olympus) with a 60x/1.4 oil immersion objective.  
49  
50  
51  
52  
53  
54  
55  
56  
57  
58  
59  
60



### Co-sedimentation assay

Cell pellets were resuspended in 0.5 ml lysis buffer (50 mM NaCl; 20 mM HEPES-KOH pH=7.1; 3 mM MgCl<sub>2</sub>; 1 mM PMSF; 20 nM pepstatin; 6 nM leupeptin; 2 ng/ml chymostatin; 5% glycerol; 0.5% NP-40) and incubated for 30 min at 4°C in the presence of 0.1 mg/ml RNase A (Sigma-Aldrich). Lysates were then sonicated at 4°C in a BioRuptor sonicator (Diagenode) using 25 pulses of 25 s at setting H (with 25 second intervals), and centrifuged at 15,000 x g for 15 min at 4°C. Cleared extracts were loaded onto 13ml continuous 10-30% glycerol gradients containing 50 mM NaCl, 20 mM HEPES-KOH pH=7.1, 3 mM MgCl<sub>2</sub>, 1 mM PMSF, 20 nM pepstatin, 6 nM leupeptin, 2 ng/ml chymostatin, and centrifuged at 274,000 x g for 18 h at 4°C; fractions were collected using an ÄKTA FPLC machine. Collected fractions were precipitated with TCA (final concentration 10%) overnight. Samples were then centrifuged at 15,000 x g for 15 min at 4°C, washed with 1 ml of cold acetone and centrifuged again under the same conditions. Proteins were resuspended in SDS sample buffer (64 mM Tris-HCl pH=6.8, 15% 2-mercaptoethanol, 10% glycerol, 2% SDS, 0.1% bromophenol blue) and used for western blotting analysis.

### Structural analysis

HBS1LV3 helix models were created and visualized using Coot (36) and PyMOL (The PyMOL Molecular Graphics System, Schrödinger, LLC). Initial rigid-body docking was performed using the ZDOCK server (37) in an unbiased way (i.e., without selection of blocking and contacting residues). For homology modeling, available structures of *S. cerevisiae* Rrp43 in complex with Rrp6 were used (PDB codes: 4IFD, 4OO1, 5C0W, 5C0X) (9, 38). In this study we also used the human exosome structure (PDB code: 2NN6) (39).

### Western blot analysis

Samples were processed using  $\alpha$ -HBS1L (1:2000; HPA029729; Sigma-Aldrich),  $\alpha$ -EXOSC3 (1:3000; 15062-1-AP; Proteintech Europe),  $\alpha$ -SKI2W (1:600; 11462-1-AP; Proteintech Europe),  $\alpha$ -DIS3L (1:2000; HPA041805 Sigma-Aldrich),  $\alpha$ -GFP (1:2000; sc-9996; Santa Cruz) and  $\alpha$ -GAPDH (1:5000, NB300-327; Novus Biologicals) antibodies. Primary antibodies were detected with goat  $\alpha$ -rabbit or  $\alpha$ -mouse secondary antibodies (Calbiochem) conjugated with horseradish peroxidase and visualized using an Immun-Star WesternC Chemiluminescence Kit (Bio-Rad) according to the manufacturer's protocol. Signals from ECL substrates were detected and documented using X-ray film (developed with AGFA CP1000) or by the charge-coupled device (CCD) camera in the FluorChem SP Superior Performance Imaging System (Alpha Innotech).

### Oligonucleotides

Oligonucleotides used in cloning, site-directed mutagenesis, qPCR and northern blotting are listed in Supplementary Tables S1, S2, S3 and S4, respectively.

### Northern blot analysis

Total RNA was extracted using the standard TRI Reagent protocol (Sigma-Aldrich), according to manufacturer's instructions. RNA (13  $\mu$ g) was separated by electrophoresis on a 1% denaturing formaldehyde-agarose gel. RNA was then transferred onto Hybond N+ (GE Healthcare) membranes by overnight capillary transfer in 20x SSC solution (3 M NaCl, 0.3 M sodium citrate) and fixed on the membrane by UV cross-linking at 254 nm. Hybridization procedures were carried out in PerfectHyb Plus hybridization buffer (Sigma-Aldrich). The blots were hybridized overnight at 63°C with respective PCR-based probes (see

1  
2  
3 Supplementary Table S4 for primers used for amplifications with human cDNA as a  
4  
5 template), labelled by random-priming with [ $\alpha$ -<sup>32</sup>P]dATP and a DecaLabel DNA Labeling Kit  
6  
7 (Thermo Scientific) according to the manufacturer's instructions. After hybridization,  
8  
9 membranes were washed twice with 2x SSC, 0.1% SDS at 63°C for 45 min and exposed to a  
10  
11 Phosphorimager screen (FujiFilm), which was then scanned using a FLA7000 scanner  
12  
13 (FujiFilm). Between hybridizations, probes were stripped off the membranes at 65°C using  
14  
15 boiling 0.1% SDS (two washes, 45 min each).  
16  
17  
18  
19  
20  
21  
22  
23  
24  
25  
26  
27  
28  
29  
30  
31  
32  
33  
34  
35  
36  
37  
38  
39  
40  
41  
42  
43  
44  
45  
46  
47  
48  
49  
50  
51  
52  
53  
54  
55  
56  
57  
58  
59  
60

## Results

### A short isoform of HBS1L interacts with the exosome complex

To identify proteins interacting with the cytoplasmic form of the exosome, co-immunoprecipitation (Co-IP) experiments were performed using stable HEK293 cell lines producing an EGFP-tagged DIS3L protein or RRP4 exosome core subunit (Figure 1A and B, Figure S2). In addition to high-salt conditions that enabled reductions in background signals, we conducted Co-IPs from cells treated with the cell-permeable cross-linker dithiobis[succinimidyl propionate] (DSP), to increase the likelihood of detecting weak, transient interactions. The enriched proteins were then identified by high-resolution mass spectrometry (MS) and analyzed by label-free quantification (LFQ) using MaxQuant software (40, 41) (Figure 1A and B; Figure S1; Figure S2; Dataset S1). As expected, using DIS3L-EGFP as bait we recovered high amounts of all exosome core components, whereas the amount of the nucleus-specific subunits DIS3 and EXOSC10 was not significant. For RRP4-EGFP Co-IP assays carried out in parallel, we observed 2-3 orders of magnitude higher levels of nucleus-specific components. Importantly, all subunits of the SKI complex were detected in DIS3L-EGFP cross-linked samples, although the amount of the smallest one – WDR61 – was relatively low, because of which it was discarded by the LFQ algorithm. This indicates that the human exosome indeed physically interacts with the SKI complex. Interestingly, we also identified the HBS1L protein in the DIS3L-EGFP and RRP4-EGFP Co-IP experiments. Closer inspection of the peptides revealed that for the DIS3L-EGFP Co-IP, only the N-terminal fragment of the canonical HBS1L (HBS1LV1) was represented in the MS spectrum. A previous study indicated that HBS1L pre-mRNA may be alternatively spliced (42). Indeed, we observed several peptides that mapped to the putative protein encoded by the short splicing isoform of the *HBS1L*, which we will hereafter refer to as *HBS1LV3*. Analysis of

1  
2  
3  
4  
5  
6  
7  
8  
9  
10  
11  
12  
13  
14  
15  
16  
17  
18  
19  
20  
21  
22  
23  
24  
25  
26  
27  
28  
29  
30  
31  
32  
33  
34  
35  
36  
37  
38  
39  
40  
41  
42  
43  
44  
45  
46  
47  
48  
49  
50  
51  
52  
53  
54  
55  
56  
57  
58  
59  
60

cDNA clones and RNA-seq data revealed that, apart from the canonical variant, additional transcripts that potentially coded for HBS1LV3 indeed existed in human cells (Figure 2). In contrast, a putative *HBS1LV2* mRNA, which is annotated in databases, was undetectable in HEK293 cells using RT-PCR. To further confirm the existence of HBS1LV3, we attempted to raise specific antibodies that recognized HBS1LV3, but were unable to obtain antibodies with sufficient specificity for this isoform. However, commercial antibodies raised against a fragment located within the N-terminal region that is common to both HBS1LV1 and HBS1LV3 produced two bands on a western blot. siRNA-mediated silencing in HEK293 cell lines confirmed that the main, upper band corresponded to the canonical HBS1LV1 variant while the less intense, lower band was consistent with the HBS1LV3 variant (Figure 1C).

The DIS3L Co-IP-MS experiments recovered not only the SKI complex and the exosome but also many other putative interactors (Figure S2; Dataset S1). However, the majority of these other proteins was highly sub-stoichiometric or had relatively low specificity. Although we cannot exclude the possibility that the cytoplasmic exosome and/or the SKI complex have other functionally relevant interacting partners, their analysis is outside the scope of this study.

Together, our analyses revealed that the human cytoplasmic exosome interacts with the HBS1LV3, a protein encoded by the short splicing variant of *HBS1L*. Thus, like Ski7 in yeast, in humans HBS1LV3 likely links the human exosome with the SKI complex.

### HBS1LV3 links the exosome with the SKI complex

The yeast Ski7 is a multi-domain protein. The N-terminal fragment of Ski7 participates in interactions with both the exosome and the SKI complex (23). The C-terminal region of Ski7 shares similarities with the eRF3 (eukaryotic release factor 3) protein, and consists of 3 domains: a GTP-binding domain that recognizes an empty A site in ribosomes during non-stop decay (NSD), followed by two beta barrels (43, 44). Interestingly, the C-terminal domain Ski7 shares similarity with the yeast Hbs1 protein (Figure 1D). HBS1LV3 in humans has an N-terminal region that is identical to the canonical HBS1LV1 variant and shares sequence similarity with the yeast Ski7 (Figure 1D). In contrast, the HBS1LV3 C-terminal part displays no similarity to any known protein, apart from its orthologues in other vertebrate species (Figure S4). Although *in silico* predictions revealed the presence of some secondary structure features in the HBS1LV3 C-terminal part (Figure S5), making reliable predictions of the structure in this part of the protein was difficult.

In order to further characterize HBS1LV3 and HBS1LV1, the respective cDNAs were cloned and stable cell lines producing EGFP-tagged proteins were constructed. In parallel with HBS1LV1 and HBS1LV3, a cell line producing EGFP-tagged SKI2W was similarly generated to serve as a control for subsequent experiments. Importantly, confocal imaging revealed that EGFP-tagged HBS1LV3 localized to the cytoplasm in human HEK293 cells, which is in agreement with its co-purification with DIS3L (Figure 3).

Subsequent Co-IP-MS experiments revealed that the newly discovered HBS1LV3 protein specifically interacts with the cytoplasmic exosome complex, since, in addition to the exosome core subunits, we identified the exclusively cytoplasmic DIS3L exoribonuclease but not its nuclear paralogue, the DIS3 protein, which localizes mainly in the nucleoplasm of human cells (Figure 1E and F, Figure S2). Finally, SKI complex components also co-purified with HBS1LV3. Meanwhile, canonical HBS1LV1 did not seem to interact with the exosome, but did co-purify with the SKI complex (Figure 1E and F, Figure S2). This result indicated

1  
2  
3 that the N-terminal fragment shared by both analyzed HBS1L isoforms is responsible for  
4 interactions with the SKI complex but not with the exosome. Importantly, the well-known  
5 HBS1LV1 binding partner and Dom34 homologue, the PELOTA protein, did not co-purify  
6 with HBS1LV3 (Figure 1E and F; Figure S2), suggesting that the two HBS1L variants play  
7 different roles. Finally, MS analyses showed that SKI2W co-purified with all predicted SKI  
8 complex subunits as well as HBS1LV3 and the exosome (Dataset S1).  
9  
10  
11  
12  
13  
14  
15

16 In order to verify if HBS1LV3, like Ski7 in yeast, bridges the exosome with the SKI  
17 complex in humans, we performed co-sedimentation experiments using extracts from control  
18 cells and cells depleted of HBS1LV3 or HBS1LV1. The extracts were separated in linear  
19 glycerol gradient, followed by western blot detection of SKI2W, DIS3L and HBS1L (Figure 4  
20 and Figure S3, where the second biological replica is shown). First of all, it is clearly visible  
21 that gross amounts of SKI2W and DIS3L migrate as separate assemblies with peaks at  
22 fractions 6-8 for SKI2W and 8-10 for DIS3L, **which is in agreement with the transient nature**  
23 **of the SKI/exosome supercomplex formation**. However, they are also partially migrating as  
24 higher molecular weight species (lanes 9-13). Importantly, depletion of HBS1LV3 strongly  
25 reduces that fraction (Figure 4; compare upper and bottom panels). Interestingly, upon  
26 HBS1LV1 depletion, there is an opposite effect, i.e. more DIS3L and SKI2W migrate as  
27 larger assemblies (Figure 4; compare upper and middle panels). This is probably because  
28 HBS1LV1 competes with HBS1LV3 for interactions with the SKI complex, thus inhibiting  
29 exosome complex association with the SKI. Finally, HBS1LV3 (which unfortunately is well-  
30 visible only in HBS1LV1 depleted samples) co-migrates with DIS3L, enriching towards  
31 higher molecular weight species. Altogether, these data strongly suggest that HBS1LV3  
32 indeed bridges SKI complex with the exosome, since HBS1LV3 levels determine the  
33 efficiency of the SKI/exosome supercomplex formation.  
34  
35  
36  
37  
38  
39  
40  
41  
42  
43  
44  
45  
46  
47  
48  
49  
50  
51  
52  
53  
54  
55  
56  
57  
58  
59  
60

### The unique C-terminal region of HBS1LV3 binds to the exosome core

The exosome-interacting fragments in the HBS1LV3 variant likely reside within its unique C-terminal region. In order to determine the approximate location of exosome-binding motifs within HBS1LV3, we carried out Co-IP experiments with EGFP-tagged, C-terminally truncated proteins. We observed that full-length and minimally truncated proteins (HBS1LV3, HBS1LV3<sup>1-602</sup> and HBS1LV3<sup>1-572</sup>) co-purified with both RRP40 (exosome core protein) and the SKI2W helicase (Figure 5A and B). Meanwhile, longer truncations (HBS1LV3<sup>1-546</sup> and HBS1LV3<sup>1-516</sup>) substantially weakened interaction with the exosome RRP40 protein (Figure 5A and B), indicating that HBS1LV3 residues that participate in interactions with the exosome complex are located downstream of position 546. Interestingly, this region is also the most conserved one (Figure S4), and contains a previously identified motif PFDFxxxSPDDIVKxNQ (aa 609-625) (42).

To further characterize the exosome-interacting motifs, we divided the extreme C-terminal amino acids (aa 546-632) of the HBS1LV3 protein into 3 fragments referred to as: Fragment 1 (aa 546-572), 2 (aa 572-602) and 3 (aa 602-632). Co-IP experiments using EGFP-tagged single (1 and 3) and fused (1+2, 1+2+3, 1+3 and 2+3) fragments were then conducted (Figure 5A and C). We demonstrated that the core exosome interacts with an increasing efficiency, as evidenced by anti-RRP40 western blot detection, with constructs comprising Fragments 1, 1+2 and 1+2+3, respectively. The interaction is weaker for Fragments 1+3 and there were no interactions seen with Fragments 3 and 2+3 (Figure 5A and C). In addition, these fragments do not contribute to the HBS1LV3/SKI interactions, which is consistent with previous observations. Thus, we conclude that Fragment 1 (aa 546-572) is crucial and sufficient to mediate interactions with the exosome, while other regions of the HBS1LV3 C-terminus, including the PFDFxxxSPDDIVKxNQ motif, play a minor role in the interaction.



### The HBS1LV3 peptide docks into the RRP43 exosome ring subunit

We next analyzed the amino acid sequence of the HBS1LV3 exosome-interacting fragment (aa 546-572), and found that these residues may adopt an alpha-helical conformation (Figure 6A, S4 and S5), which allowed us to model its structure based on an ideal helix conformation.

We used the previously determined structure of the human exosome ring (PDB ID: 2NN6) (39) and performed automatic docking of HBS1LV3 exosome-interacting fragment using the ZDOCK server (37) (Figure 6A, Figure S6). Strikingly, 5 out of the 10 best predictions docked into the surface of the RRP43 exosome core subunit in exactly the same position as where the DIRIRAGNFKSALANLE peptide of yeast Rrp6 maps into yeast Rrp43 (Figure 6A and B) (9, 38). **In contrast Ski7 residues located in proximity of the abovementioned Rrp43 surface are mainly disordered and do not make contacts with Rrp43 (23).**

The critical residues of the yeast Rrp6 peptide DIRIRAGNFKSALANLE involved in the interaction with Rrp43 are R602, F606 and L610 (Figure 6B, Figure S6D) (9, 38). Remarkably, the HBS1LV3 fragment (aa 546-572) contains a conserved RxxxFxxxL motif in which the R559, F563 and L567 residues are spaced similarly to yeast Rrp6 (Figure S6F). However, the predicted helical region of HBS1LV3 could be smaller than that of yeast Rrp6 due to the presence of two prolines at positions 560 and 572. The first proline is after a conserved arginine (R559), so this arginine is likely to be located just outside the helix. In the crystal structure of the yeast Rrp6/exosome complex, this conserved arginine (R559) makes contacts with main chain atoms as well as with the side chain of glutamic acid (E48), which is conserved in the human exosome (E31) (Figure S6). In yeast Rrp6, phenylalanine 606 (F606, equivalent to F563 in HBS1LV3) is part of a stacking interaction with an Rrp43 histidine (H34). In human RRP43 this histidine is substituted with a phenylalanine (F17) that can also engage in a stacking interaction (Figure 6A and B; Figure S6). Strikingly, a model of the

1  
2  
3 HBS1LV3 C-terminal peptide further optimized by homology modeling, docked into the  
4 human exosome structure, fits well with the corresponding binding site in human RRP43. In  
5 particular, the R559 and F563 residues of HBS1LV3 that are crucial for HBS1LV3/exosome  
6 interactions docked well into the RRP43 binding site (Figure 6A and B). Furthermore, there is  
7 an additional aromatic residue tyrosine (Y13) in the human RRP43 exosome subunit that is  
8 located near the conserved F17 in such a way that the helix's phenylalanine (F563) is located  
9 between the human RRP43 F17 and Y13 residues, thus this tyrosine can also take part in a  
10 stacking interaction (Figure 6A and B). In the case of the yeast, conserved leucine (L610) of  
11 Rrp6 makes contact with the side-chain of a Rrp43 threonine (T16) (Figure S6C). This amino  
12 acid is also present in the HBS1LV3 RxxxFxxxL motif (L567). Although the precise role of  
13 this amino acid in the exosome/HBS1LV3 linkage is difficult to predict, because T16 is not  
14 conserved, the interaction could involve hydrophobic contacts.  
15  
16  
17  
18  
19  
20  
21  
22  
23  
24  
25  
26  
27  
28  
29

30 To provide experimental support for our model, we performed site directed  
31 mutagenesis to substitute alanines at crucial residues in the HBS1LV3 C-terminal peptide  
32 (R559A, F563A, L567A; HBS1LV3 MUT). Mutation of these residues largely abolished  
33 interactions of HBS1LV3 with the exosome (Figure 6C). Thus, the identified peptide and its  
34 crucial amino acids are both essential and sufficient for HBS1LV3/exosome interactions.  
35  
36  
37  
38  
39  
40  
41  
42  
43

#### 44 **The HBS1LV3 protein participates in the cytoplasmic exosome-dependent mRNA decay** 45 **pathway**

46  
47  
48 To identify transcripts that are degraded by cytoplasmic SKI/HBS1LV3/exosome  
49 supercomplexes, we used specific siRNAs to knock down expression of genes coding for  
50 HBS1L proteins and SKI2W helicase in HEK293 cells. In order to reduce the risk of possible  
51 siRNA off-target effects, parallel rescue experiments were performed in which cell lines  
52 exogenously producing siRNA-insensitive protein variants were treated with respective  
53  
54  
55  
56  
57  
58  
59  
60

1  
2  
3  
4  
5  
6  
7  
8  
9  
10  
11  
12  
13  
14  
15  
16  
17  
18  
19  
20  
21  
22  
23  
24  
25  
26  
27  
28  
29  
30  
31  
32  
33  
34  
35  
36  
37  
38  
39  
40  
41  
42  
43  
44  
45  
46  
47  
48  
49  
50  
51  
52  
53  
54  
55  
56  
57  
58  
59  
60

siRNAs. Slight overexpression of exogenous proteins compared to the endogenous proteins' levels was observed (Figure S7). qPCR-based mRNA quantification in siRNA-treated cells showed a 50-91% decrease in siRNA-targeted transcript levels (Figure S8A-C). Moreover, these results were validated at the protein level by western blot analysis (Figure S8D), which demonstrated that even relatively modest decreases in transcript levels resulted in a strong decrease in the protein amounts. Total ribo-depleted RNA-seq libraries were prepared from all cell lines treated with siRNAs in triplicate. On average, 13.9 million reads were uniquely mapped to the genome for each library.

To identify genes with altered expression, we compared the effect of siRNA silencing of *HBS1LV1*, *HBS1LV3* or *SKIV2L* with respective rescue cell lines treated with the same siRNAs. Differential expression analysis revealed varying degrees of influence of siRNA-mediated protein depletion on steady-state levels of known transcripts. Importantly, depletion of *HBS1LV3* had the strongest effect on the transcriptome with 2,142 genes (11,301 transcripts) deregulated by more than 1.5-fold, whereas depletion of *SKI2W* altered expression of 608 genes (4,135 transcripts). Depletion of canonical *HBS1LV1* had the weakest effect on gene expression, giving only 199 statistically significant hits (1,483 transcripts) (Figure 7A-C), despite the fact that depletion of both mRNA and protein appeared to be equal or even more efficient for *HBS1LV1* than for *HBS1LV3* and *SKIV2L* (Figure S8).

Direct mRNA substrates of the cytoplasmic exosome would be expected to be stabilized when the components of this complex are depleted, and indeed more genes were upregulated than downregulated in the presence of specific siRNAs (1,387 for *HBS1LV3*, 508 for *SKIV2L* and 145 for *HBS1LV1*). We then looked at the overlap of these hits to assess the functional intersection of the analyzed proteins. A more pronounced intersection between *HBS1LV3* and *SKIV2L* (54% of the *SKIV2L* set and 20% of the *HBS1LV3* set were common) occurred relative to canonical *HBS1LV1* with the other sets (8-10% *SKIV2L*-*HBS1LV1*

1  
2  
3 common hits and 10-15% *HBS1LV3-HBS1LV1* common hits) (Figure 7D). Because the  
4  
5 overlap of considerably different-sized sets (over 8-fold different) may be confusing to  
6  
7 interpret, we also compared sets of fixed sizes that contained the most significantly  
8  
9 deregulated genes rather than choosing an absolute significance threshold. For the top 200  
10  
11 most significantly upregulated genes, there were twice as many common targets for  
12  
13 HBS1LV3 compared to SKI2W than for HBS1LV1 compared to SKI2W or to HBS1LV3.  
14  
15

16  
17 Together, our data demonstrated that the lack of the HBS1LV3 or the SKI2W protein  
18  
19 resulted in similar global effects, which **strongly suggests** their involvement in the same  
20  
21 mRNA degradation pathway. However, **since the effect of HBS1LV3 depletion was overall**  
22  
23 **stronger than that of SKI2W, we cannot exclude that HBS1LV3 has a SKI complex-**  
24  
25 **independent role in RNA decay. Finally,** the function of HBS1LV1 in transcriptome  
26  
27 homeostasis appears to be less important.  
28  
29  
30  
31  
32

### 33 **The HBS1LV3 protein enables proper cytoplasmic mRNA decay**

34  
35  
36 Data obtained from high-throughput experiments was further validated by qPCR (Figure S9).  
37  
38 The transcripts most significantly affected by *HBS1LV3* downregulation (*NOSIP*, *TRAPPC2L*  
39  
40 splicing variant and *TNFRSF12A*) were selected and tested. We demonstrated that **levels of**  
41  
42 **the** selected transcripts increased on average 2-2.5-fold in the *HBS1LV3* isoform knockdown  
43  
44 compared to control **samples**. Rescue experiments conducted simultaneously restored the  
45  
46 wild-type phenotype, thereby confirming the previously obtained results.  
47  
48  
49

50  
51 To verify whether the observed upregulation of mRNA levels in HBS1LV3-depleted  
52  
53 cells resulted from inhibition of mRNA decay, we measured the half-lives of selected  
54  
55 transcripts by experiments using actinomycin D treatment to inhibit transcription. As in the  
56  
57 previous experiments, we depleted proteins of interest using RNAi and then assessed *NOSIP*,  
58  
59  
60

1  
2  
3 *TRAPPC2L* splicing variant, *TNFRSF12A* and mitochondrial *ATP6/8* (negative control)  
4 transcript levels following 0, 2, 4 and 6 hours of transcription inhibition by 4  $\mu\text{g/ml}$  of  
5 actinomycin D. All three tested mRNAs were stabilized in HBS1LV3-depleted cells with  
6 half-lives up to 5.5-fold longer than in control cells (Figure 7E; Figure S10). SKI2W  
7 depletion resulted in stabilization of *NOSIP* and *TNFRSF12A* mRNAs, with up to 2-fold  
8 higher half-lives, but not of the alternative *TRAPPC2L* mRNA. *ATP6/8* remained largely  
9 unchanged in both cases. These results were further confirmed by northern blot analysis  
10 (Figure 7F).  
11  
12  
13  
14  
15  
16  
17  
18  
19

20  
21 Together, these data strongly suggest that the inhibition of cytoplasmic mRNA decay  
22 occurs upon downregulation of *HBS1LV3* or *SKI2W*. Gene ontology analysis of transcripts  
23 upregulated following HBS1LV3 depletion did not identify any particular cellular process as  
24 being more significantly affected, suggesting that HBS1LV3 plays a general rather than  
25 specific role in cytoplasmic exosome-mediated mRNA decay.  
26  
27  
28  
29  
30  
31  
32  
33  
34  
35

## 36 Discussion

37  
38  
39  
40

41 The structure-function relationship of Hbs1 and Ski7 proteins deserves an evolutionary  
42 consideration. *Saccharomyces* species have two separate genes, probably as a consequence of  
43 a genome duplication event, one encoding Hbs1 and the other Ski7 (42). Both proteins have a  
44 C-terminal eRF3-like domain (Figure 1D), postulated to interact with the ribosome A site and  
45 important to translation-based quality control pathways (29). Due to sequence differences, the  
46 longer N-terminal region of Ski7 can bind the exosome and SKI while the C-terminal domain  
47 of Hbs1 interacts with Dom34, another factor involved in releasing stalled ribosomes.  
48 However, in other fungi alternative mRNA splicing of a single *HBS1/SKI7* gene gives rise to  
49  
50  
51  
52  
53  
54  
55  
56  
57  
58  
59  
60

1  
2  
3 two proteins that differ in their N-terminal region and only the longer one can bind the  
4  
5  
6  
7  
8  
9  
10  
11  
12  
13  
14  
15  
16  
17  
18  
19  
20  
21  
22  
23  
24  
25  
26  
27  
28  
29  
30  
31  
32  
33  
34  
35  
36  
37  
38  
39  
40  
41  
42  
43  
44  
45  
46  
47  
48  
49  
50  
51  
52  
53  
54  
55  
56  
57  
58  
59  
60

two proteins that differ in their N-terminal region and only the longer one can bind the  
exosome and SKI complex; the short form is thought to perform Hbs1 functions and the long  
one – Ski7 functions (42, 45). In these species the C-terminal eRF3-like domain is identical in  
both proteins (22, 42) and thus presumably both can interact with Dom34. A similar  
phenomenon may occur in plants, where the HBS1 seems to be alternatively spliced and  
previous studies suggested that one of the gene's products may have Ski7-like properties (42).  
Here we show an analogous situation in humans, where the *HBS1L* mRNA undergoes  
alternative splicing to yield two proteins. The canonical Hbs1-like protein HBS1LV1 can  
interacts with SKI and PELOTA (human homolog of Dom34) (Figure 1E and F; Figure S2)  
(29). The newly discovered Ski7-like HBS1LV3 has the same N-terminal region, facilitating  
interaction with SKI, but the eRF3-like domain is replaced by a unique C-terminal region that  
binds to the exosome. Notably, this arrangement is specific to vertebrates (Figure S4) as the  
HBS1LV3 protein seems to be absent from all other metazoans and the nature of the SKI-  
exosome interaction in those animals remains unknown.

In yeast, Ski7 is a stable component of the cytoplasmic exosome, while its interactions  
with the SKI complex are more transient (46). In this study, quantification of the Co-IP-MS  
experiments as well as the fact that cross-linking was essential for efficient SKI complex  
recovery in the cytoplasmic exosome pull-down assays strongly suggested that, like yeast  
Ski7, human HBS1LV3 is more strongly associated with the exosome core than the SKI.  
Although the exact molecular mechanism of cooperation between the exosome and the SKI  
complex in humans awaits further characterization, the molecular modeling experiments  
supported by mutagenesis that we presented in this study support an association between  
HBS1LV3 and the exosome core that is mediated by the RxxxFxxxL motif located between  
residues 559 and 567 of HBS1LV3. This interaction between HBS1LV3 and the RRP43 ring  
subunit resembles Rrp6 binding to the exosome core in *S. cerevisiae*. Another conserved

1  
2  
3 motif with the sequence PFDfxxxSPDDIVKxNQ is located at the extreme C-terminus of  
4 human HBS1LV3 (aa 609-625) (42). Although the function of this motif is unclear, our data  
5 showed that these residues play a minor role in HBS1LV3/exosome interactions. Since the  
6 RxxxFxxxL motif identified in HBS1LV3 lies in a region that the yeast Ski7 protein lacks, the  
7 interaction of Ski7 with the yeast exosome core likely differs from that of the  
8 HBS1LV3/exosome interaction in humans. Indeed, a recently published structure of yeast  
9 Ski7/exosome complex revealed that Ski7 does not bind the Rrp43 region predicted by our  
10 homology modelling to be responsible for HBS1LV3 helix recognition (23) pointing to a  
11 similar but distinct mode of binding that is utilised by HBS1LV3. This difference would be  
12 another example of the rapid evolution of protein-protein interaction motifs between different  
13 species, with a preservation of a general interaction network that is quite common for proteins  
14 involved in RNA decay (47).  
15  
16  
17  
18  
19  
20  
21  
22  
23  
24  
25  
26  
27  
28  
29

30 The eRF3-like domain of yeast Ski7 is not essential for exosome-mediated 3'-5' decay,  
31 but is important for other RNA quality control pathways such as no-go decay, and is  
32 postulated to interact with the ribosomal A-site (29). The human Ski7-like protein HBS1LV3  
33 lacks an eRF3-like domain, suggesting that HBS1LV3 may not directly participate in  
34 translation-dependent surveillance pathways. Indeed, we could not detect overrepresentation  
35 of mRNAs that are predicted to be subject to such quality control pathways among the genes  
36 that were upregulated upon HBS1LV3 depletion. Thus, our transcriptomic analysis strongly  
37 suggests that HBS1LV3 is mainly involved in bulk mRNA turnover, although it is highly  
38 probable that in HEK293 cells XRN1-mediated 5'-3' degradation or DIS3L2-mediated 3'-5'  
39 decay also play an important role in shaping the global transcriptomic landscape (1).  
40  
41  
42  
43  
44  
45  
46  
47  
48  
49  
50  
51

52 Although the canonical human HBS1LV1 does not bind to the exosome, it can still  
53 interact with the SKI complex, which is not the case for yeast Hbs1. Thus, HBS1LV1 can  
54 compete with HBS1LV3 for SKI complex and thus inhibit SKI/exosome supercomplex  
55  
56  
57  
58  
59  
60

1  
2  
3 formation, although the exact role of HBS1LV1/SKI association remains to be determined.  
4  
5 The relatively small effect of HBS1LV1 depletion on the steady-state mRNA levels suggests  
6  
7 however that this protein does not play an important role in the decay of normal mRNA.  
8  
9 Consistent with this possibility, canonical HBS1LV1 in humans was recently proposed to be  
10  
11 involved in a quality control mechanism (e.g., non-stop mRNA decay) in mammalian cells  
12  
13 (29).  
14  
15

16  
17 In HEK293 cells the HBS1LV3 protein is produced at much lower levels than the  
18  
19 canonical variant HBS1LV1 (Figure 1C, Figure S8D). In contrast to HEK293 cells, available  
20  
21 data show that high amounts of *HBS1LV3* expression occur in chronic myeloid leukemia cell  
22  
23 lines and in bone marrow ([www.proteinatlas.org](http://www.proteinatlas.org)), which suggests that the  
24  
25 SKI/HBS1LV3/exosome supercomplex may play a primary role in mRNA decay in  
26  
27 hematopoietic cells. These conjectures are consistent with the fact that exosome-dependent  
28  
29 RNA decay involving the cytoplasmic exoribonuclease DIS3L controls primary erythroid cell  
30  
31 maturation (48).  
32  
33

34  
35 In conclusion, here we have identified HBS1LV3, an analogue of the yeast Ski7  
36  
37 protein, which is a long-sought linker between the human cytoplasmic exosome and the SKI  
38  
39 complex, and in vertebrates is encoded by a specific splicing isoform of the HBS1L  
40  
41 surveillance factor. The identification of HBS1LV3 provides new insights into exosome-  
42  
43 mediated mRNA decay in humans.  
44  
45  
46  
47  
48

#### 49 **Accession Numbers**

50  
51 RNA-seq data supporting the conclusions of this article are available in the NCBI GEO  
52  
53 repository <http://www.ncbi.nlm.nih.gov/geo/>, accession number GSE77926  
54  
55  
56  
57  
58  
59  
60



## Supplementary Data Statement

Supplementary Data are available at NAR Online

## Funding

This work was supported by the National Science Centre grants [NCN Maestro: UMO-2011/02/A/NZ1/00001 and NCN Harmonia: UMO-2013/10/M/NZ4/00299] as well as the Foundation for Polish Science fellowships [Master and Ideas for Poland] to AD. Experiments were carried out with the use of CePT infrastructure that was financed by the European Union via the European Regional Development Fund [Innovative economy 2007–13, Agreement POIG.02.02.00-14-024/08-00].

## Acknowledgements

We thank Ambro van Hoof for inspiration, all the members of the AD laboratory for their support and Szymon Świeżewski for critical reading of this manuscript. Author contributions: AD conceived and directed the studies. K. Kalisiak designed most of the experiments, constructed the majority of the vectors, established stable human cell lines, performed all biochemical assays and validation experiments, prepared RNA-seq libraries and participated in localization studies and statistical analysis. TMK performed bioinformatics analyses. RT participated in designing the experiments, in the northern blot and co-sedimentation assays. DC performed high resolution mass spectrometry analysis. ZP performed docking, homology modeling and structural analyses. AC participated in localization studies and statistical analysis. K. Kowalska participated in vector construction. AD and K. Kalisiak wrote the paper with contributions from RT, TK, ZP and AC.

## References

1. Lubas,M., Damgaard,C.K., Tomecki,R., Cysewski,D., Jensen,T.H. and Dziembowski,A. (2013) Exonuclease hDIS3L2 specifies an exosome-independent 3'-5' degradation pathway of human cytoplasmic mRNA. *EMBO J.*, **32**, 1855–1868.
2. Malecki,M., Viegas,S.C., Carneiro,T., Golik,P., Dressaire,C., Ferreira,M.G. and Arraiano,C.M. (2013) The exoribonuclease Dis3L2 defines a novel eukaryotic RNA degradation pathway. *EMBO J.*, **32**, 1842–1854.
3. Mitchell,P., Petfalski,E., Shevchenko,A., Mann,M. and Tollervey,D. (1997) The exosome: a conserved eukaryotic RNA processing complex containing multiple 3'→5' exoribonucleases. *Cell*, **91**, 457–466.
4. Chlebowski,A., Lubas,M., Jensen,T.H. and Dziembowski,A. (2013) RNA decay machines: the exosome. *Biochim. Biophys. Acta*, **1829**, 552–560.
5. Tomecki,R., Kristiansen,M.S., Lykke-Andersen,S., Chlebowski,A., Larsen,K.M., Szczesny,R.J., Drazkowska,K., Pastula,A., Andersen,J.S., Stepień,P.P., *et al.* (2010) The human core exosome interacts with differentially localized processive RNases: hDIS3 and hDIS3L. *EMBO J.*, **29**, 2342–2357.
6. Staals,R.H.J., Bronkhorst,A.W., Schilders,G., Slomovic,S., Schuster,G., Heck,A.J.R., Raijmakers,R. and Pruijn,G.J.M. (2010) Dis3-like 1: a novel exoribonuclease associated with the human exosome. *EMBO J.*, **29**, 2358–2367.
7. Lykke-Andersen,S., Tomecki,R., Jensen,T.H. and Dziembowski,A. (2011) The eukaryotic RNA exosome: same scaffold but variable catalytic subunits. *RNA Biol.*, **8**, 61–66.
8. Malet,H., Topf,M., Clare,D.K., Ebert,J., Bonneau,F., Basquin,J., Drazkowska,K., Tomecki,R., Dziembowski,A., Conti,E., *et al.* (2010) RNA channelling by the eukaryotic exosome. *EMBO Rep.*, **11**, 936–942.
9. Makino,D.L., Baumgärtner,M. and Conti,E. (2013) Crystal structure of an RNA-bound 11-subunit eukaryotic exosome complex. *Nature*, **495**, 70–75.
10. Wasmuth,E.V. and Lima,C.D. (2012) Exo- and endoribonucleolytic activities of yeast cytoplasmic and nuclear RNA exosomes are dependent on the noncatalytic core and central channel. *Mol. Cell*, **48**, 133–144.
11. Drazkowska,K., Tomecki,R., Stodus,K., Kowalska,K., Czarnocki-Cieciura,M. and Dziembowski,A. (2013) The RNA exosome complex central channel controls both exonuclease and endonuclease Dis3 activities in vivo and in vitro. *Nucleic Acids Res.*, **41**, 3845–3858.
12. Makino,D.L., Schuch,B., Stegmann,E., Baumgärtner,M., Basquin,C. and Conti,E. (2015) RNA degradation paths in a 12-subunit nuclear exosome complex. *Nature*, **524**, 54–58.
13. Anderson,J.S. and Parker,R.P. (1998) The 3' to 5' degradation of yeast mRNAs is a general mechanism for mRNA turnover that requires the SKI2 DEVH box protein and 3' to 5' exonucleases of the exosome complex. *EMBO J.*, **17**, 1497–1506.

14. Araki, Y., Takahashi, S., Kobayashi, T., Kajiho, H., Hoshino, S. and Katada, T. (2001) Ski7p G protein interacts with the exosome and the Ski complex for 3'-to-5' mRNA decay in yeast. *EMBO J.*, **20**, 4684–4693.
15. van Hoof, A., Staples, R.R., Baker, R.E. and Parker, R. (2000) Function of the ski4p (Csl4p) and Ski7p proteins in 3'-to-5' degradation of mRNA. *Mol. Cell. Biol.*, **20**, 8230–8243.
16. Ridley, S.P., Sommer, S.S. and Wickner, R.B. (1984) Superkiller mutations in *Saccharomyces cerevisiae* suppress exclusion of M2 double-stranded RNA by L-A-HN and confer cold sensitivity in the presence of M and L-A-HN. *Mol. Cell. Biol.*, **4**, 761–770.
17. Halbach, F., Reichelt, P., Rode, M. and Conti, E. (2013) The yeast ski complex: crystal structure and RNA channeling to the exosome complex. *Cell*, **154**, 814–826.
18. Zhu, B., Mandal, S.S., Pham, A.-D., Zheng, Y., Erdjument-Bromage, H., Batra, S.K., Tempst, P. and Reinberg, D. (2005) The human PAF complex coordinates transcription with events downstream of RNA synthesis. *Genes Dev.*, **19**, 1668–1673.
19. Fabre, A., Charroux, B., Martinez-Vinson, C., Roquelaure, B., Odul, E., Sayar, E., Smith, H., Colomb, V., Andre, N., Hugot, J.-P., *et al.* (2012) SKIV2L mutations cause syndromic diarrhea, or trichohepatoenteric syndrome. *Am. J. Hum. Genet.*, **90**, 689–692.
20. Hartley, J.L., Zachos, N.C., Dawood, B., Donowitz, M., Forman, J., Pollitt, R.J., Morgan, N.V., Tee, L., Gissen, P., Kahr, W.H.A., *et al.* (2010) Mutations in TTC37 cause trichohepatoenteric syndrome (phenotypic diarrhea of infancy). *Gastroenterology*, **138**, 2388–2398, 2398–2.
21. Eckard, S.C., Rice, G.I., Fabre, A., Badens, C., Gray, E.E., Hartley, J.L., Crow, Y.J. and Stetson, D.B. (2014) The SKIV2L RNA exosome limits activation of the RIG-I-like receptors. *Nat. Immunol.*, **15**, 839–845.
22. Kowalinski, E., Schuller, A., Green, R. and Conti, E. (2015) *Saccharomyces cerevisiae* Ski7 Is a GTP-Binding Protein Adopting the Characteristic Conformation of Active Translational GTPases. *Struct. Lond. Engl. 1993*, **23**, 1336–1343.
23. Kowalinski, E., Kögel, A., Ebert, J., Reichelt, P., Stegmann, E., Habermann, B. and Conti, E. (2016) Structure of a Cytoplasmic 11-Subunit RNA Exosome Complex. *Mol. Cell*, **63**, 125–134.
24. Benard, L., Carroll, K., Valle, R.C.P., Masison, D.C. and Wickner, R.B. (1999) The Ski7 Antiviral Protein Is an EF1- $\alpha$  Homolog That Blocks Expression of Non-Poly(A) mRNA in *Saccharomyces cerevisiae*. *J. Virol.*, **73**, 2893–2900.
25. van Hoof, A., Lennertz, P. and Parker, R. (2000) Yeast Exosome Mutants Accumulate 3'-Extended Polyadenylated Forms of U4 Small Nuclear RNA and Small Nucleolar RNAs. *Mol. Cell. Biol.*, **20**, 441–452.
26. Tsuboi, T., Kuroha, K., Kudo, K., Makino, S., Inoue, E., Kashima, I. and Inada, T. (2012) Dom34:hbs1 plays a general role in quality-control systems by dissociation of a stalled ribosome at the 3' end of aberrant mRNA. *Mol. Cell*, **46**, 518–529.

- 1  
2  
3 27. Doma,M.K. and Parker,R. (2006) Endonucleolytic cleavage of eukaryotic mRNAs with  
4 stalls in translation elongation. *Nature*, **440**, 561–564.  
5  
6 28. Atkinson,G.C., Baldauf,S.L. and Hauryliuk,V. (2008) Evolution of nonstop, no-go and  
7 nonsense-mediated mRNA decay and their termination factor-derived components.  
8 *BMC Evol. Biol.*, **8**, 290.  
9  
10 29. Saito,S., Hosoda,N. and Hoshino,S. (2013) The Hbs1-Dom34 protein complex functions  
11 in non-stop mRNA decay in mammalian cells. *J. Biol. Chem.*, **288**, 17832–17843.  
12  
13 30. Tsuchiya,F., Kano,R., Sano,J., Oguma,K. and Hasegawa,A. (2006) Apoptosis of canine  
14 mammary tumor cells induced by small interfering RNA (siRNA) against Bcl-xL  
15 gene. *J. Vet. Med. Sci. Jpn. Soc. Vet. Sci.*, **68**, 1199–1201.  
16  
17 31. Girard,C., Will,C.L., Peng,J., Makarov,E.M., Kastner,B., Lemm,I., Urlaub,H.,  
18 Hartmuth,K. and Lührmann,R. (2012) Post-transcriptional spliceosomes are retained  
19 in nuclear speckles until splicing completion. *Nat. Commun.*, **3**, 994.  
20  
21 32. Płociński,P., Laubitz,D., Cysewski,D., Stodur, K., Kowalska,K. and Dziembowski,A.  
22 (2014) Identification of protein partners in mycobacteria using a single-step affinity  
23 purification method. *PloS One*, **9**, e91380.  
24  
25 33. Wessel,D. and Flügge,U.I. (1984) A method for the quantitative recovery of protein in  
26 dilute solution in the presence of detergents and lipids. *Anal. Biochem.*, **138**, 141–143.  
27  
28 34. Dobin,A., Davis,C.A., Schlesinger,F., Drenkow,J., Zaleski,C., Jha,S., Batut,P.,  
29 Chaisson,M. and Gingeras,T.R. (2013) STAR: ultrafast universal RNA-seq aligner.  
30 *Bioinforma. Oxf. Engl.*, **29**, 15–21.  
31  
32 35. Love,M.I., Huber,W. and Anders,S. (2014) Moderated estimation of fold change and  
33 dispersion for RNA-seq data with DESeq2. *Genome Biol.*, **15**, 550.  
34  
35 36. Emsley,P., Lohkamp,B., Scott,W.G. and Cowtan,K. (2010) Features and development of  
36 Coot. *Acta Crystallogr. D Biol. Crystallogr.*, **66**, 486–501.  
37  
38 37. Pierce,B.G., Wiehe,K., Hwang,H., Kim,B.-H., Vreven,T. and Weng,Z. (2014) ZDOCK  
39 server: interactive docking prediction of protein-protein complexes and symmetric  
40 multimers. *Bioinforma. Oxf. Engl.*, **30**, 1771–1773.  
41  
42 38. Wasmuth,E.V., Januszyk,K. and Lima,C.D. (2014) Structure of an Rrp6-RNA exosome  
43 complex bound to poly(A) RNA. *Nature*, **511**, 435–439.  
44  
45 39. Liu,Q., Greimann,J.C. and Lima,C.D. (2006) Reconstitution, activities, and structure of  
46 the eukaryotic RNA exosome. *Cell*, **127**, 1223–1237.  
47  
48 40. Cox,J. and Mann,M. (2008) MaxQuant enables high peptide identification rates,  
49 individualized p.p.b.-range mass accuracies and proteome-wide protein quantification.  
50 *Nat. Biotechnol.*, **26**, 1367–1372.  
51  
52 41. Cox,J., Hein,M.Y., Lubner,C.A., Paron,I., Nagaraj,N. and Mann,M. (2014) Accurate  
53 proteome-wide label-free quantification by delayed normalization and maximal  
54  
55  
56  
57  
58  
59  
60

- 1  
2 peptide ratio extraction, termed MaxLFQ. *Mol. Cell. Proteomics MCP*, **13**, 2513–  
3 2526.  
4  
5  
6 42. Marshall,A.N., Montealegre,M.C., Jiménez-López,C., Lorenz,M.C. and van Hoof,A.  
7 (2013) Alternative splicing and subfunctionalization generates functional diversity in  
8 fungal proteomes. *PLoS Genet.*, **9**, e1003376.  
9  
10 43. van Hoof,A., Frischmeyer,P.A., Dietz,H.C. and Parker,R. (2002) Exosome-mediated  
11 recognition and degradation of mRNAs lacking a termination codon. *Science*, **295**,  
12 2262–2264.  
13  
14 44. Frischmeyer,P.A., van Hoof,A., O'Donnell,K., Guerrero,A.L., Parker,R. and Dietz,H.C.  
15 (2002) An mRNA surveillance mechanism that eliminates transcripts lacking  
16 termination codons. *Science*, **295**, 2258–2261.  
17  
18 45. Klauer,A.A. and van Hoof,A. (2012) Degradation of mRNAs that lack a stop codon: a  
19 decade of nonstop progress. *Wiley Interdiscip. Rev. RNA*, **3**, 649–660.  
20  
21 46. Gavin,A.-C., Aloy,P., Grandi,P., Krause,R., Boesche,M., Marzioch,M., Rau,C.,  
22 Jensen,L.J., Bastuck,S., Dimpelfeld,B., *et al.* (2006) Proteome survey reveals  
23 modularity of the yeast cell machinery. *Nature*, **440**, 631–636.  
24  
25 47. Jonas,S. and Izaurralde,E. (2013) The role of disordered protein regions in the assembly  
26 of decapping complexes and RNP granules. *Genes Dev.*, **27**, 2628–2641.  
27  
28 48. McIver,S.C., Kang,Y.-A., DeVilbiss,A.W., O'Driscoll,C.A., Ouellette,J.N., Pope,N.J.,  
29 Camprecios,G., Chang,C.-J., Yang,D., Bouhassira,E.E., *et al.* (2014) The exosome  
30 complex establishes a barricade to erythroid maturation. *Blood*, **124**, 2285–2297.  
31  
32  
33  
34  
35  
36  
37  
38  
39  
40  
41  
42  
43  
44  
45  
46  
47  
48  
49  
50  
51  
52  
53  
54  
55  
56  
57  
58  
59  
60

## Figure legends

**Figure 1.** The cytoplasmic exosome complex interacts with HBS1LV3 but not HBS1LV1 in human cells. Semi-quantitative analysis of Co-IP-MS experiments using EGFP-tagged DIS3L (A), RRP4 (B), HBS1LV3 (E) or HBS1LV1 (F) proteins as baits under high salt washing buffer conditions. Plots presents the exosome and SKI complex subunits identified in Co-IP-MS experiments while other interactors are listed in Dataset S1 and visualized in Figure S2. DSP cross-linker was used in experiments (A) and (B) at the final concentration of 2 mM. The exosome core components are coloured grey. Estimated quantities of identified proteins were calculated using the Label Free Quantification (LFQ) algorithm and are represented graphically. Protein abundance was calculated as LFQ intensity of the protein signal divided by its molecular weight and is shown on the x-axis in a logarithmic scale (log<sub>10</sub>). Specificity was defined as the ratio of protein LFQ intensity measured in the bait Co-IP to the level of the background (protein LFQ intensity in HEK293 T-REx sample), and shown on the y-axis in a logarithmic scale. (C) Western blot showing HBS1LV1 and HBS1LV3 proteins in HEK293 cells. siRNA-mediated protein depletion confirms specific HBS1L isoforms. siRNAs specific to *HBS1LV1* or *HBS1LV3* were used. Proteins were analyzed using antibodies against the N-terminus of the HBS1L and  $\alpha$ -GAPDH antibodies (loading control). Positions of the HBS1LV1 and HBS1LV3 proteins are indicated. (D) Schematic representation of the domain architecture of eRF3, Ski7, and Hbs1 from *S. cerevisiae* and human HBS1L isoforms. Protein regions sharing similar functions are shown in the same colour. Two independent regions within the N-terminal fragment of Ski7, shown in orange, are known to interact with the exosome and the SKI complex. The N-domains of eRF3 and Hbs1 are coloured white and grey, respectively. The GTPase domain is shown in blue. Domains II and III of the eRF3-like domain are coloured red and green, respectively. The C-terminal fragment of HBS1LV3 is coloured yellow.

1  
2  
3 **Figure 2.** Transcript variant coding for putative HBS1LV3 protein is present in human  
4 HEK293 cells. Illustrative screen shots from the University of California Santa Cruz (UCSC)  
5 Genome Browser. Exons are shown as blue rectangles and numbered in red. *HBS1LV1*  
6 mRNA consists of 18 exons, *HBS1LV2* mRNA lacks the third exon, and *HBS1LV3* mRNA  
7 contains an alternative fifth exon (designated as 5'). Introns are shown as lines connecting  
8 exons. Arrowheads indicate the direction of transcription. Mapped reads are shown as grey  
9 peaks. (A) Chromosomal localization of the *HBS1L* gene. (B) The UCSC Genes track of gene  
10 predictions. (C) Zoomed-in view of the junction between exon 4 and alternative exon 5. The  
11 junction was confirmed by overlapping RNA-seq reads.  
12  
13  
14  
15  
16  
17  
18  
19  
20  
21  
22  
23  
24  
25

26 **Figure 3.** EGFP-tagged HBS1LV3, HBS1LV1 and SKI2W proteins localized to the  
27 cytoplasm. Fluorescence imaging of stable HEK293 cell lines expressing EGFP-tagged  
28 HBS1LV3, HBS1LV1 or SKI2W proteins. Nuclei were stained with Hoechst. Scale bars  
29 represent 10  $\mu\text{m}$ .  
30  
31  
32  
33  
34  
35  
36  
37

38 **Figure 4.** Density-based separation of protein complexes by glycerol gradient centrifugation.  
39 (A) Protein-protein complexes were separated by glycerol gradient centrifugation.  
40 Precipitated proteins were then resolved in SDS-PAGE and analyzed by western blotting.  $\alpha$ -  
41 SKI2W,  $\alpha$ -DIS3L and  $\alpha$ -HBS1L antibodies were used. (B) SKI2W and DIS3L band  
42 intensities are shown as a line graph.  
43  
44  
45  
46  
47  
48  
49  
50  
51  
52  
53  
54  
55  
56  
57  
58  
59  
60



1  
2  
3 **Figure 5.** The HBS1LV3 C-terminus interacts with the cytoplasmic exosome complex. (A)  
4 Schematic representation of the HBS1LV3 protein. The N-terminal domain and the C-  
5 terminus of HBS1LV3 are coloured grey and yellow, respectively. Positions of protein  
6 truncations are indicated. Locations of Fragments 1, 2 and 3 used for co-immunoprecipitation  
7 experiments are depicted by red numbers. Total cell extracts were prepared using HEK293  
8 cells transiently transfected with vectors bearing EGFP-tagged full-length HBS1LV3 and  
9 truncated HBS1LV3 proteins (B) or fragments of the HBS1LV3 C-terminus (C). Co-  
10 immunoprecipitations were performed using GFP trap resin. Both the complete cell extracts  
11 (INPUT) and precipitated proteins (IP) were separated by SDS-PAGE and analyzed by  
12 western blotting.  $\alpha$ -EGFP,  $\alpha$ -RRP40 and  $\alpha$ -SKI2W antibodies were used to visualize  
13 precipitated proteins with  $\alpha$ -GAPDH antibodies serving as a loading control. The dashed lines  
14 in (B) indicate that the gel was cropped. The upper part of blots in (C) was overexposed due  
15 to the weak chemiluminescence signal.

16  
17  
18  
19  
20  
21  
22  
23  
24  
25  
26  
27  
28  
29  
30  
31  
32  
33  
34  
35 **Figure 6.** Model of HBS1LV3-exosome interactions. HBS1LV3 helix (aa 555-576) docks  
36 into the surface of RRP43. (A) Modeled human HBS1LV3 helices docked into the exosome  
37 core (PDB code: 2NN6, (39)) are shown in blue. The RRP43 protein is shown in green. The  
38 remainder of the human exosome complex is coloured grey. The 10 best predictions are  
39 shown, with 5 predictions docking into the same position on the surface of the RRP43  
40 exosome subunit. The highest ranking prediction is coloured red. Bottom: secondary structure  
41 prediction of HBS1LV3 fragment. (B) A magnified view of interactions. (C) R559, F563 and  
42 L567 HBS1LV3 amino acids are crucial for interactions with the exosome complex. Total cell  
43 extracts were prepared from HEK293 cells transiently transfected with vectors expressing  
44 either EGFP-tagged HBS1LV3 (WT) or HBS1LV3 MUT (R559A, F563A, L567A) proteins.  
45 Co-immunoprecipitations were performed using GFP trap resin. The complete cell extracts  
46  
47  
48  
49  
50  
51  
52  
53  
54  
55  
56  
57  
58  
59  
60

1  
2  
3 (INPUT) and precipitated proteins (IP) were separated by SDS-PAGE and analyzed by  
4  
5 western blotting.  $\alpha$ -HBS1L,  $\alpha$ -RRP40 and  $\alpha$ -SKI2W antibodies were used to visualize  
6  
7 precipitated proteins.  $\alpha$ -GAPDH antibodies were utilized as a loading control.  
8  
9

10  
11  
12 **Figure 7.** HBS1LV3 depletion leads to global changes in mRNA levels. MA-plots showing  
13  
14 log<sub>2</sub> fold change as a function of mean expression levels on a logarithmic scale. Differential  
15  
16 expression analysis of (A) *HBS1LV1*, (B) *HBS1LV3*, (C) *SKI2L* knockdown in HEK293 cell  
17  
18 lines rescued with overexpression of the protein of interest expressed from a siRNA-  
19  
20 insensitive construct vs. endogenous protein knockdown were analyzed. Points located below  
21  
22 the red line represent genes with more pronounced expression in the knockdown cells relative  
23  
24 to the rescue cell lines. Points located above the line reflect transcripts with relatively higher  
25  
26 steady-state levels in the rescue cell lines relative to the knockdown cell lines. Using a FDR  
27  
28 threshold of 5%, events were coloured red and black for significant and not significant,  
29  
30 respectively. Genes falling outside of the set range were plotted as empty triangles on the  
31  
32 edge of the plot area. Nuclear transcripts shown on the plot: *KCNQ1OT1*, *NEAT1*, *MALAT*,  
33  
34 *XIST*, *TSIX*, *MIAT*, *U6* and *7SK*. (D) Venn diagram showing the overlap between genes that  
35  
36 significantly accumulated in knock down cell lines (FDR threshold of 10%). RNA-seq  
37  
38 libraries were prepared in triplicate. (E) Relative mRNA level (y-axis) of *NOSIP* mRNA was  
39  
40 measured by Real-Time qPCR following 0, 2, 4 and 6 hour actinomycin D treatment. *GAPDH*  
41  
42 mRNA was used for normalization. Error bar represents SEM (5 biological replicates).  
43  
44 Dashed lines represent exponential decay fits (F). Northern blot analysis was performed using  
45  
46 RNA from actinomycin D-treated cells, with DNA probes complementary to *NOSIP*, *GAPDH*  
47  
48 and mitochondrial *ATP6/8* transcripts (negative control).  
49  
50  
51  
52  
53  
54  
55  
56  
57  
58  
59  
60

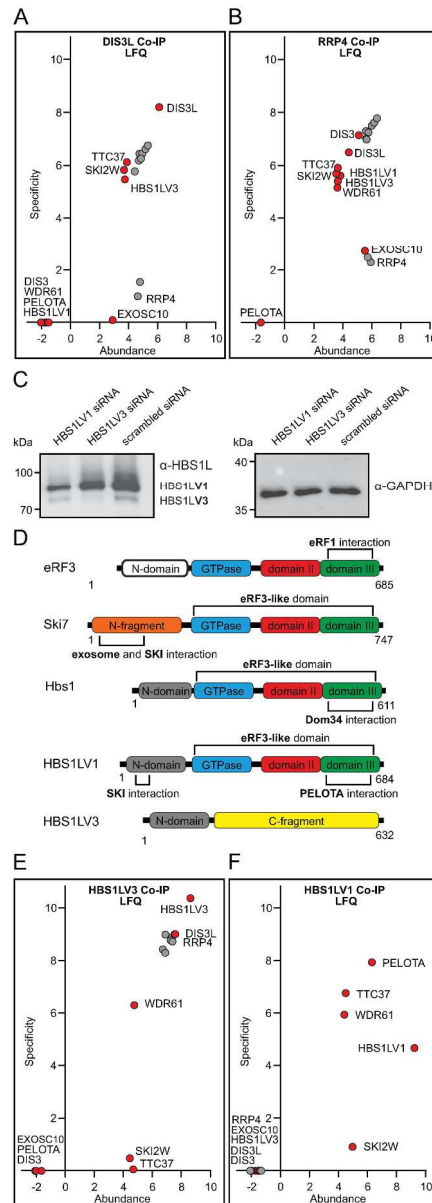

Figure 1. The cytoplasmic exosome complex interacts with HBS1LV3 but not HBS1LV1 in human cells. Semi-quantitative analysis of Co-IP-MS experiments using EGFP-tagged DIS3L (A), RRP4 (B), HBS1LV3 (E) or HBS1LV1 (F) proteins as baits under high salt washing buffer conditions. Plots presents the exosome and SKI complex subunits identified in Co-IP-MS experiments while other interactors are listed in Dataset S1 and visualized in Figure S2. DSP cross-linker was used in experiments (A) and (B) at the final concentration of 2 mM. The exosome core components are coloured grey. Estimated quantities of identified proteins were calculated using the Label Free Quantification (LFQ) algorithm and are represented graphically. Protein abundance was calculated as LFQ intensity of the protein signal divided by its molecular weight and is shown on the x-axis in a logarithmic scale ( $\log_{10}$ ). Specificity was defined as the ratio of protein LFQ intensity measured in the bait Co-IP to the level of the background (protein LFQ intensity in HEK293 T-REx sample), and shown on the y-axis in a logarithmic scale. (C) Western blot showing HBS1LV1 and HBS1LV3 proteins in HEK293 cells. siRNA-mediated protein depletion confirms specific HBS1L isoforms. siRNAs specific to *HBS1LV1* or *HBS1LV3* were used. Proteins were analyzed using antibodies against the N-terminus of the

1  
2  
3 HBS1L and  $\alpha$ -GAPDH antibodies (loading control). Positions of the HBS1LV1 and HBS1LV3 proteins are  
4 indicated. (D) Schematic representation of the domain architecture of eRF3, Ski7, and Hbs1 from *S.*  
5 *cerevisiae* and human HBS1L isoforms. Protein regions sharing similar functions are shown in the same  
6 colour. Two independent regions within the N-terminal fragment of Ski7, shown in orange, are known to  
7 interact with the exosome and the SKI complex. The N-domains of eRF3 and Hbs1 are coloured white and  
8 grey, respectively. The GTPase domain is shown in blue. Domains II and III of the eRF3-like domain are  
9 coloured red and green, respectively. The C-terminal fragment of HBS1LV3 is coloured yellow.

10 229x646mm (300 x 300 DPI)  
11  
12  
13  
14  
15  
16  
17  
18  
19  
20  
21  
22  
23  
24  
25  
26  
27  
28  
29  
30  
31  
32  
33  
34  
35  
36  
37  
38  
39  
40  
41  
42  
43  
44  
45  
46  
47  
48  
49  
50  
51  
52  
53  
54  
55  
56  
57  
58  
59  
60

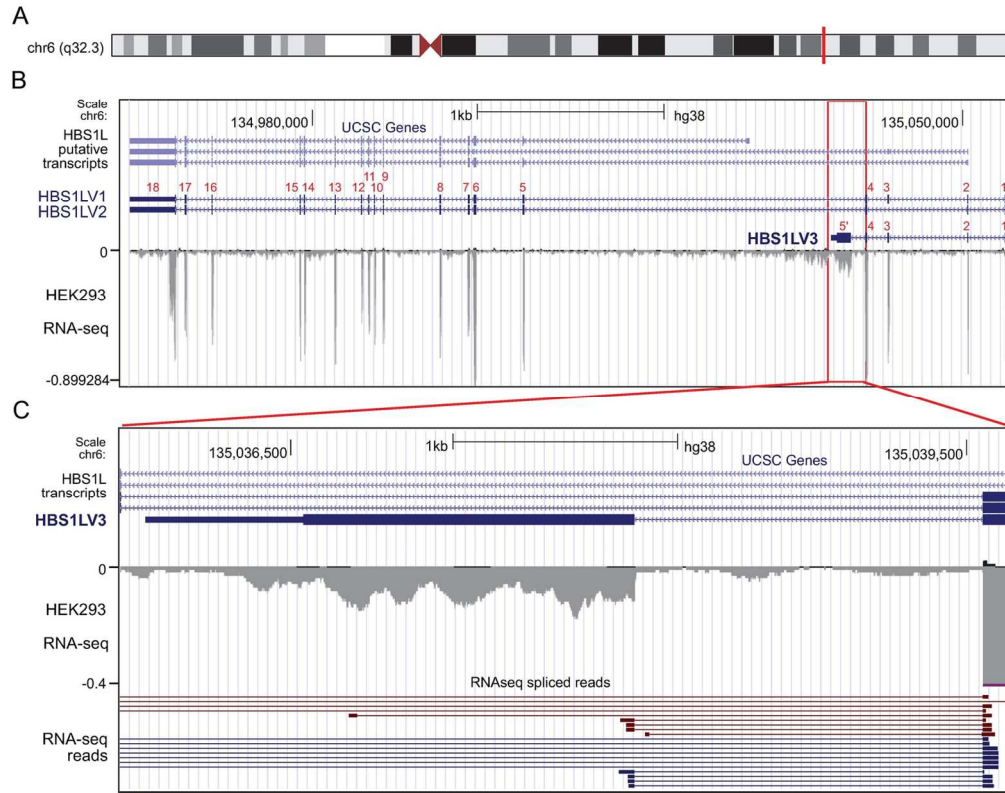

Caption : Figure 2. Transcript variant coding for putative HBS1LV3 protein is present in human HEK293 cells. Illustrative screen shots from the University of California Santa Cruz (UCSC) Genome Browser. Exons are shown as blue rectangles and numbered in red. HBS1LV1 mRNA consists of 18 exons, HBS1LV2 mRNA lacks the third exon, and HBS1LV3 mRNA contains an alternative fifth exon (designated as 5'). Introns are shown as lines connecting exons. Arrowheads indicate the direction of transcription. Mapped reads are shown as grey peaks. (A) Chromosomal localization of the HBS1L gene. (B) The UCSC Genes track of gene predictions. (C) Zoomed-in view of the junction between exon 4 and alternative exon 5. The junction was confirmed by overlapping RNA-seq reads.

137x108mm (300 x 300 DPI)

1  
2  
3  
4  
5  
6  
7  
8  
9  
10  
11  
12  
13  
14  
15  
16  
17  
18  
19  
20  
21  
22  
23  
24  
25  
26  
27  
28  
29  
30  
31  
32  
33  
34  
35  
36  
37  
38  
39  
40  
41  
42  
43  
44  
45  
46  
47  
48  
49  
50  
51  
52  
53  
54  
55  
56  
57  
58  
59  
60

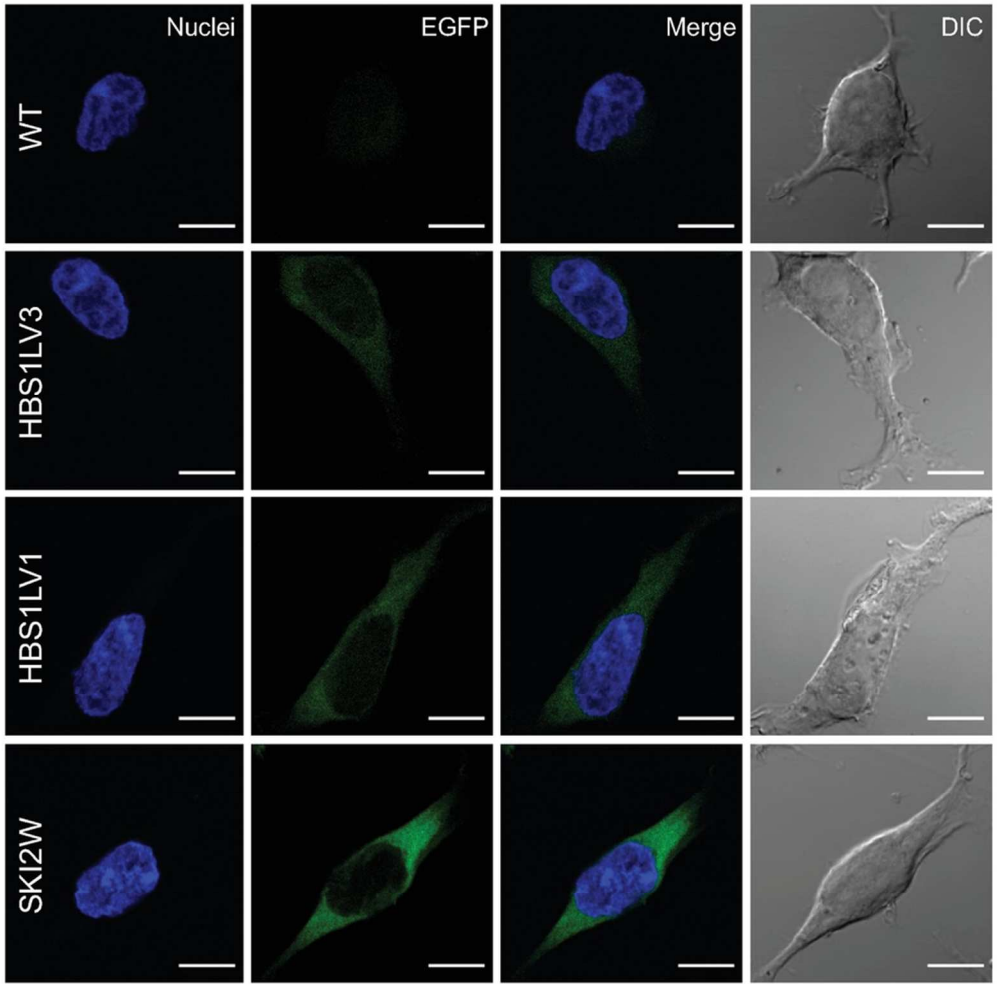

Figure 3. EGFP-tagged HBS1LV3, HBS1LV1 and SKI2W proteins localized to the cytoplasm. Fluorescence imaging of stable HEK293 cell lines expressing EGFP-tagged HBS1LV3, HBS1LV1 or SKI2W proteins. Nuclei were stained with Hoechst. Scale bars represent 10  $\mu$ m.

83x82mm (300 x 300 DPI)

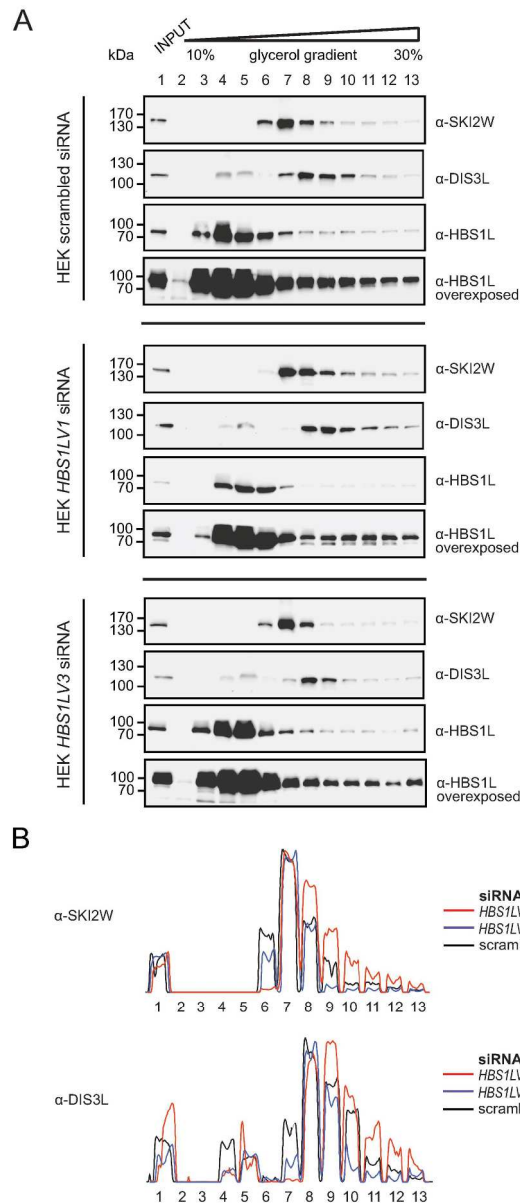

Figure 4. Density-based separation of protein complexes by glycerol gradient centrifugation. (A) Protein-protein complexes were separated by glycerol gradient centrifugation. Precipitated proteins were then resolved in SDS-PAGE and analyzed by western blotting.  $\alpha$ -SKI2W,  $\alpha$ -DIS3L and  $\alpha$ -HBS1L antibodies were used. (B) SKI2W and DIS3L band intensities are shown as a line graph.

173x387mm (300 x 300 DPI)

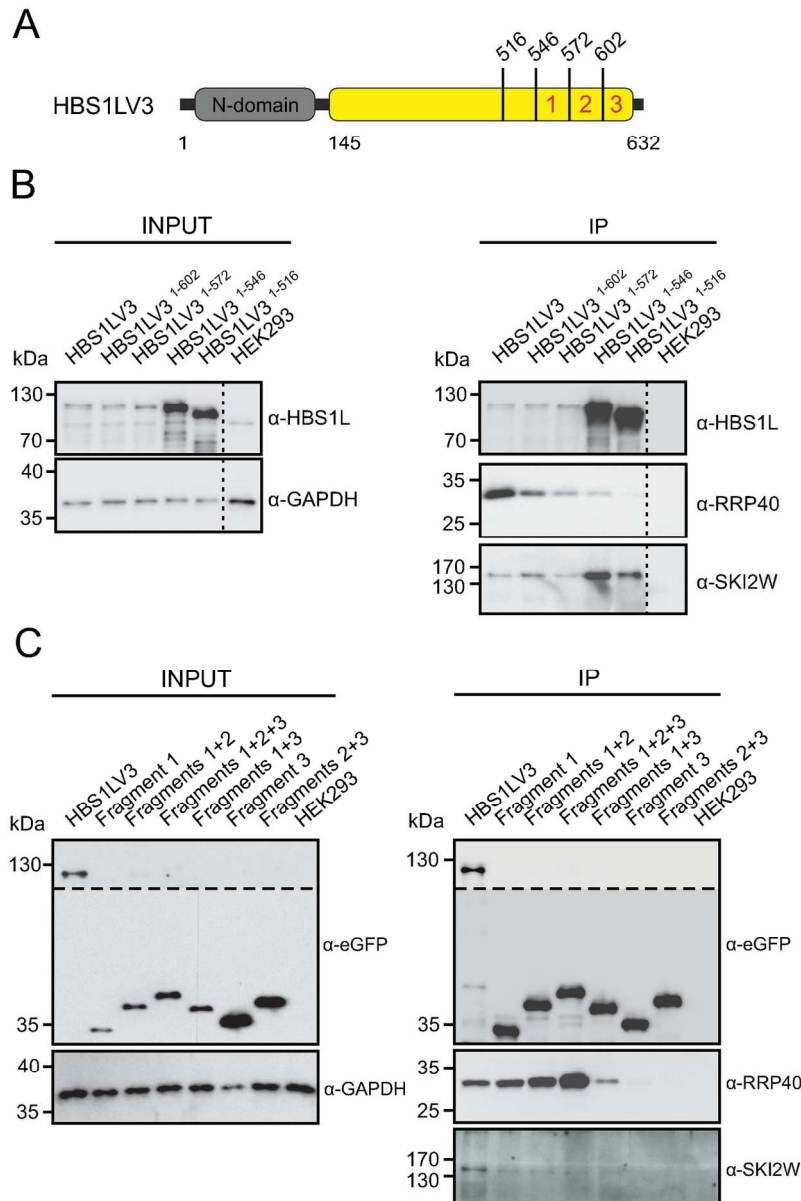

Figure 5. The HBS1LV3 C-terminus interacts with the cytoplasmic exosome complex. (A) Schematic representation of the HBS1LV3 protein. The N-terminal domain and the C-terminus of HBS1LV3 are coloured grey and yellow, respectively. Positions of protein truncations are indicated. Locations of Fragments 1, 2 and 3 used for co-immunoprecipitation experiments are depicted by red numbers. Total cell extracts were prepared using HEK293 cells transiently transfected with vectors bearing EGFP-tagged full-length HBS1LV3 and truncated HBS1LV3 proteins (B) or fragments of the HBS1LV3 C-terminus (C). Co-immunoprecipitations were performed using GFP trap resin. Both the complete cell extracts (INPUT) and precipitated proteins (IP) were separated by SDS-PAGE and analyzed by western blotting.  $\alpha$ -EGFP,  $\alpha$ -RRP40 and  $\alpha$ -SKI2W antibodies were used to visualize precipitated proteins with  $\alpha$ -GAPDH antibodies serving as a loading control. The dashed lines in (B) indicate that the gel was cropped. The upper part of blots in (C) was overexposed due to the weak chemiluminescence signal.

126x190mm (300 x 300 DPI)



1  
2  
3  
4  
5  
6  
7  
8  
9  
10  
11  
12  
13  
14  
15  
16  
17  
18  
19  
20  
21  
22  
23  
24  
25  
26  
27  
28  
29  
30  
31  
32  
33  
34  
35  
36  
37  
38  
39  
40  
41  
42  
43  
44  
45  
46  
47  
48  
49  
50  
51  
52  
53  
54  
55  
56  
57  
58  
59  
60

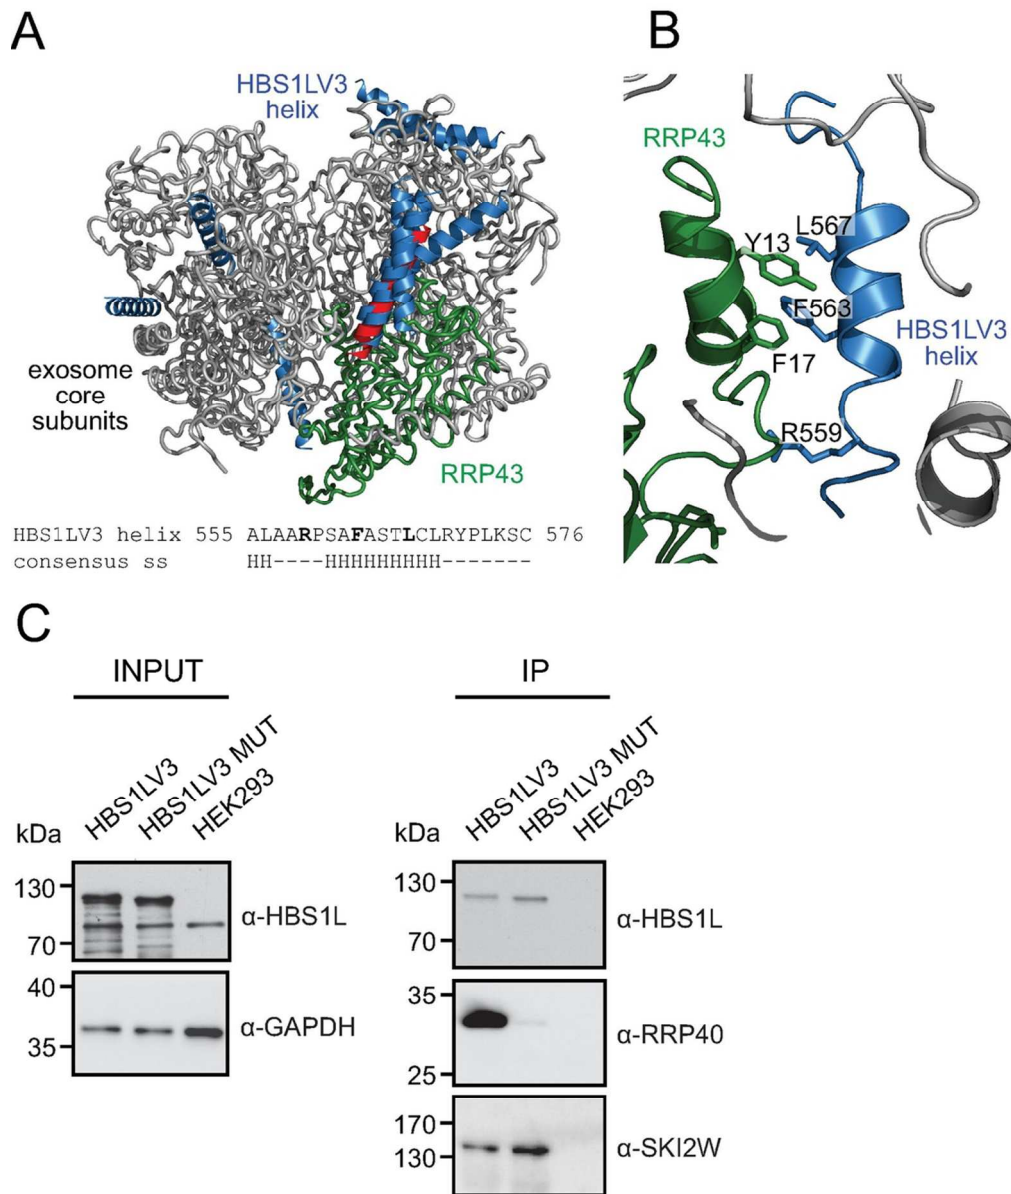

Figure 6. Model of HBS1LV3-exosome interactions. HBS1LV3 helix (aa 555-576) docks into the surface of RRP43. (A) Modeled human HBS1LV3 helices docked into the exosome core (PDB code: 2NN6, (38)) are shown in blue. The RRP43 protein is shown in green. The remainder of the human exosome complex is coloured grey. The 10 best predictions are shown, with 5 predictions docking into the same position on the surface of the RRP43 exosome subunit. The highest ranking prediction is coloured red. Bottom: secondary structure prediction of HBS1LV3 fragment. (B) A magnified view of interactions. (C) R559, F563 and L567 HBS1LV3 amino acids are crucial for interactions with the exosome complex. Total cell extracts were prepared from HEK293 cells transiently transfected with vectors expressing either EGFP-tagged HBS1LV3 (WT) or HBS1LV3 MUT (R559A, F563A, L567A) proteins. Co-immunoprecipitations were performed using GFP trap resin. The complete cell extracts (INPUT) and precipitated proteins (IP) were separated by SDS-PAGE and analyzed by western blotting.  $\alpha$ -HBS1L,  $\alpha$ -RRP40 and  $\alpha$ -SKI2W antibodies were used to visualize precipitated proteins.  $\alpha$ -GAPDH antibodies were utilized as a loading control.

97x115mm (300 x 300 DPI)

1  
2  
3  
4  
5  
6  
7  
8  
9  
10  
11  
12  
13  
14  
15  
16  
17  
18  
19  
20  
21  
22  
23  
24  
25  
26  
27  
28  
29  
30  
31  
32  
33  
34  
35  
36  
37  
38  
39  
40  
41  
42  
43  
44  
45  
46  
47  
48  
49  
50  
51  
52  
53  
54  
55  
56  
57  
58  
59  
60

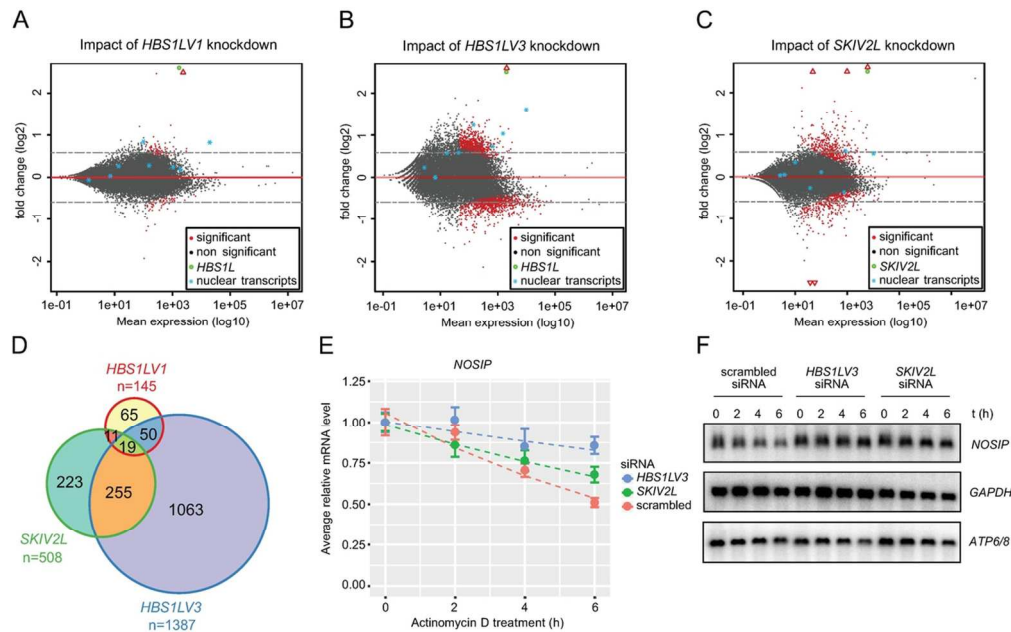

Figure 7. HBS1LV3 depletion leads to global changes in mRNA levels. MA-plots showing log<sub>2</sub> fold change as a function of mean expression levels on a logarithmic scale. Differential expression analysis of (A) *HBS1LV1*, (B) *HBS1LV3*, (C) *SKIV2L* knockdown in HEK293 cell lines rescued with overexpression of the protein of interest expressed from a siRNA-insensitive construct vs. endogenous protein knockdown were analyzed. Points located below the red line represent genes with more pronounced expression in the knockdown cells relative to the rescue cell lines. Points located above the line reflect transcripts with relatively higher steady-state levels in the rescue cell lines relative to the knockdown cell lines. Using a FDR threshold of 5%, events were coloured red and black for significant and not significant, respectively. Genes falling outside of the set range were plotted as empty triangles on the edge of the plot area. Nuclear transcripts shown on the plot: *KCNQ1OT1*, *NEAT1*, *MALAT*, *XIST*, *TSIX*, *MIAT*, *U6* and *7SK*. (D) Venn diagram showing the overlap between genes that significantly accumulated in knock down cell lines (FDR threshold of 10%). RNA-seq libraries were prepared in triplicate. (E) Relative mRNA level (y-axis) of *NOSIP* mRNA was measured by Real-Time qPCR following 0, 2, 4 and 6 hour actinomycin D treatment. *GAPDH* mRNA was used for normalization. Error bar represents SEM (5 biological replicates). Dashed lines represent exponential decay fits (F). Northern blot analysis was performed using RNA from actinomycin D-treated cells, with DNA probes complementary to *NOSIP*, *GAPDH* and mitochondrial *ATP 6/8* transcripts (negative control).

109x68mm (300 x 300 DPI)

1  
2  
3 **SUPPLEMENTARY DATA**  
4  
5  
6  
7  
8

9 **A short splicing isoform of HBS1L links the cytoplasmic exosome and SKI complexes in**  
10 **humans**  
11

12  
13  
14 Katarzyna Kalisiak, Tomasz M. Kuliński, Rafał Tomecki, Dominik Cysewski, Zbigniew  
15 Pietras, Aleksander Chlebowski, Katarzyna Kowalska, Andrzej Dziembowski  
16  
17  
18  
19  
20  
21  
22  
23  
24  
25  
26  
27  
28  
29  
30  
31

32 SUPPLEMENTARY TABLES (Page 2)  
33

34 SUPPLEMENTARY FIGURES AND LEGENDS (Page 5)  
35  
36

37 SUPPLEMENTARY FILES (Page 21)  
38  
39

40 SUPPLEMENTARY METHODS (Page 22)  
41  
42

43 SUPPLEMENTARY REFERENCES (Page 24)  
44  
45  
46  
47  
48  
49  
50  
51  
52  
53  
54  
55  
56  
57  
58  
59  
60

## SUPPLEMENTARY TABLES

**Supplementary Table S1.** Oligonucleotides used for cloning. Primers contain overhangs (shown in green) used for N-terminal EGFP-tagging in sequence and ligation-independent cloning (SLIC):

| Cloned genes/fragments                                                             | Forward primer (5'-3')                                          | Reverse primer (5'-3')                                                     | Tagging   |
|------------------------------------------------------------------------------------|-----------------------------------------------------------------|----------------------------------------------------------------------------|-----------|
| <i>HBS1LV1</i>                                                                     | GGATCCGAAAACCTGTACT<br>TCCAAGGAACCGGTATGG<br>CCCGGCATCGGAATGTTC | GATATCACCCCTGAAAATACA<br>AATTCTCGCTAGCTTATTCTT<br>TTATCTCAGTGACAAC         | N-tagging |
| <i>SKIV2L</i>                                                                      | GGATCCGAAAACCTGTACT<br>TCCAAGGAACCGGTATGAT<br>GGAGACAGAGCGACTTG | GATATCACCCCTGAAAATACA<br>AATTCTCGCTAGCTTACTGG<br>GTGTAGAGGCTGGC            | N-tagging |
| <i>HBS1LV3</i>                                                                     | GGATCCGAAAACCTGTACT<br>TCCAAGGAACCGGTATGG<br>CCCGGCATCGGAATGTTC | GATATCACCCCTGAAAATACA<br>AATTCTCGCTAGCTTATTCT<br>CTAGTAAATGCTTTTTTTTG      | N-tagging |
| <i>HBS1LV3</i><br>aa 1-602                                                         | GGATCCGAAAACCTGTACT<br>TCCAAGGAACCGGTATGG<br>CCCGGCATCGGAATGTTC | GATATCACCCCTGAAAATACA<br>AATTCTCGCTAGCTTAACCTT<br>ATTTCTTTGTCCTTTACATC     | N-tagging |
| <i>HBS1LV3</i><br>aa 1-572                                                         | GGATCCGAAAACCTGTACT<br>TCCAAGGAACCGGTATGG<br>CCCGGCATCGGAATGTTC | GATATCACCCCTGAAAATACA<br>AATTCTCGCTAGCTTATGGG<br>TAACGAAGACACAGTGTTG       | N-tagging |
| <i>HBS1LV3</i><br>aa 1-546                                                         | GGATCCGAAAACCTGTACT<br>TCCAAGGAACCGGTATGG<br>CCCGGCATCGGAATGTTC | GATATCACCCCTGAAAATACA<br>AATTCTCGCTAGCTTATGGT<br>TTCCTAGTCAGAGAGCCTTT<br>G | N-tagging |
| <i>HBS1LV3</i><br>aa 1-516                                                         | GGATCCGAAAACCTGTACT<br>TCCAAGGAACCGGTATGG<br>CCCGGCATCGGAATGTTC | ATCACCCCTGAAAATACAAAT<br>TCTCGCTAGCTTATCGTGAT<br>GATGGAGCAATGG             | N-tagging |
| <i>HBS1LV3</i><br>aa 547-632<br>"Fragments<br>1+2+3"                               | TCCGAAAACCTGTACTTCC<br>AAGGAACCGGTCCTTTTTTC<br>TCTCTCTGGAC      | GATATCACCCCTGAAAATACA<br>AATTCTCGCTAGCTTATTCT<br>CTAGTAAATGCTTTTTTTTG      | N-tagging |
| <i>HBS1LV3</i><br>aa 547-602<br>"Fragments 1+2"                                    | TCCGAAAACCTGTACTTCC<br>AAGGAACCGGTCCTTTTTTC<br>TCTCTCTGGAC      | ACCCTGAAAATACAAATTCT<br>CGCTAGCTTAACTTATTTCTT<br>TGTCCTTTAC                | N-tagging |
| <i>HBS1LV3</i><br>aa 547-572<br>"Fragment 1"                                       | TCCGAAAACCTGTACTTCC<br>AAGGAACCGGTCCTTTTTTC<br>TCTCTCTGGAC      | ACCCTGAAAATACAAATTCT<br>CGCTAGCTTATGGGTAACGA<br>AGACACAGTG                 | N-tagging |
| <i>HBS1LV3</i><br>aa 547-572 and<br>aa 603-632<br>"Fragments 1+3"<br>Primer pair I | TCCGAAAACCTGTACTTCC<br>AAGGAACCGGTCCTTTTTTC<br>TCTCTCTGGAC      | GATATCACCCCTGAAAATACA<br>AATTCTCGCTAGCTTATTCT<br>CTAGTAAATGCTTTTTTTTG      | N-tagging |

|                                                                                     |                                                            |                                                                        |           |
|-------------------------------------------------------------------------------------|------------------------------------------------------------|------------------------------------------------------------------------|-----------|
| <i>HBS1LV3</i><br>aa 547-572 and<br>aa 603-632<br>“Fragments 1+3”<br>Primer pair II | TTGCCTCAACACTGTGTC<br>TTCGTTACCCACCACTTGT<br>AGCAATAACACC  | GAAGTCAAATGGTGTTATTG<br>CTACAAGTGGTGGGTAACG<br>AAGACACAGTG             | N-tagging |
| <i>HBS1LV3</i><br>aa 603-632<br>“Fragment 3”                                        | TCCGAAAACCTGTACTTCC<br>AAGGAACCGGTCCACTTGT<br>AGCAATAACACC | GATATCACCCCTGAAAATACA<br>AATTCTCGCTAGCTTATTCT<br>CTAGTAAATGCTTTTTTTTGG | N-tagging |
| <i>HBS1LV3</i><br>aa 573-632<br>“Fragments 2+3”                                     | TCCGAAAACCTGTACTTCC<br>AAGGAACCGGTCTGAAAA<br>GCTGCAAGCGACG | GATATCACCCCTGAAAATACA<br>AATTCTCGCTAGCTTATTCT<br>CTAGTAAATGCTTTTTTTTGG | N-tagging |

**Supplementary Table S2.** Oligonucleotides used for site-directed mutagenesis.

| mRNA<br>recoded<br>region     | Forward primer (5'-3')                                          | Reverse primer (5'-3')                                        | Mutagenesis<br>purpose                                                        |
|-------------------------------|-----------------------------------------------------------------|---------------------------------------------------------------|-------------------------------------------------------------------------------|
| <i>HBS1LV1</i><br>436-456nt   | AGGAAAACCTGTGCGACTC<br>GCAAACCTAGTCGAAGTGA<br>ATCTGAAATTGTGCC   | CACTTCGACTAGTTTGGC<br>AGTCGACAGGTTTTCCCTT<br>TTGCTATCTTTCCTG  | insensitivity to<br><i>HBS1LV1</i> siRNA                                      |
| <i>HBS1LV3</i><br>1240-1260nt | GATCCTTTCCACTCAGTCA<br>GCTAGCTAACCGCTGTGAG<br>TCTTCAACCGGAATATC | GACAGCGGTTAGCTAGCT<br>GACTGAGTGGAAAGGAT<br>CCCAAACCTAGATCTGTG | insensitivity to<br>#1 <i>HBS1LV3</i> siRNA                                   |
| <i>HBS1LV3</i><br>1308-1334nt | GATCTCTGAGTAGTCTTGC<br>TTTCCACAAGGCCTCCCC<br>ACAAGAGACCTTGAG    | CTTGTGGGGGAGGCCTTG<br>TGGAAAGCAAGACTACT<br>CAGAGATCCTGTTAATTC | insensitivity to<br>#2 <i>HBS1LV3</i> siRNA<br>and<br>#3 <i>HBS1LV3</i> siRNA |
| <i>SKIV2L</i><br>523-543nt    | GGCTGAGGAAGAAATCGA<br>TTTCGAAAAGGATCTTCTT<br>ACTATTCCACCTGG     | GAAGATCCTTTTCGAAAT<br>CGATTTCTTCCTCAGCCT<br>CCTCCCGTGTGTTC    | insensitivity to<br>#1 <i>SKIV2L</i> siRNA                                    |
| <i>SKIV2L</i><br>628-648nt    | CTACTATCCTTGTGATGCA<br>TGCTTGAACCTCTGGATTT<br>GGGTGGGGGTG       | CCAGAGGTTCAAGCATG<br>CATGACAAGGATAGTAG<br>TCCAGGAGCTGGAG      | insensitivity to<br>#2 <i>SKIV2L</i> siRNA                                    |
| <i>HBS1LV3</i><br>1674-1701nt | TGCACCTCAGCTGCTGCT<br>AGCACAGCTTGTCTTCGTT<br>ACCC               | AGCTGTGCTAGCAGCAG<br>CTGAAGGTGCAGCAGCA<br>AGGGCC              | Mutations<br>R559A; F563A;<br>L567A                                           |

**Supplementary Table S3.** Oligonucleotides used for qPCR validation

| <b>Transcript</b>                   | <b>Forward primer (5'-3')</b> | <b>Reverse primer (5'-3')</b> |
|-------------------------------------|-------------------------------|-------------------------------|
| <i>NOSIP</i>                        | TGGTGGACCCTGTGACTGGAGAC       | GGCCGTGATTTCTCCGCTTGC         |
| <i>TNFRSF12A</i>                    | CTTTGGCCCATCCTTG              | GGGTGGTGAACCTTCTC             |
| <i>TRAPPC2L</i><br>splicing variant | CAGCATGGGCATTTCTCTG           | TGGTGACGTAGCCGTATC            |
| <i>HBS1LV1</i>                      | CTGTGCTGTTACACTACC            | GCATTCTGGCCTTTAGTC            |
| <i>HBS1LV3</i>                      | GGCAACAGTATCTACAGGAAAG        | TGCTGACTGAGGATAAGAAC          |
| <i>SKIV2L</i>                       | GATTGCTGCCTTGCTCTC            | ACCTGGACCTCACCAATC            |
| <i>GAPDH</i>                        | GTCAGCCGCATCTTCTTTTG          | GCGCCAATACGACCAAATC           |
| <i>MALAT1</i>                       | AACTTCTCTGCCACATCG            | CACAAGGATCCAAGCTACTG          |
| <i>XIST</i>                         | CGCTTTGGCAGAGAATGAC           | CTAGCCCTAAGCCGAGTTATG         |
| <i>mtATP 6/8</i>                    | CCATCAGCCTACTCATTCAACC        | GCGACAGCGATTTCTAGGATAG        |

**Supplementary Table S4.** Oligonucleotides used for synthesis of northern blot probes

| <b>Detected transcript</b> | <b>Forward primer (5'-3')</b> | <b>Reverse primer (5'-3')</b> |
|----------------------------|-------------------------------|-------------------------------|
| <i>GAPDH</i>               | GAAGGTGGAGGTCGGAGTC           | GAAGATGGTGATGGGATTTC          |
| <i>mtATP 6/8</i>           | GACTAATCACCAACCAACAA          | TGTCGTGCAGGTAGAGGCTT          |
| <i>NOSIP</i>               | ATTCGACTGAGCCGGGATG           | GGCCGTGATTTCTCCGCTTGC         |



## SUPPLEMENTARY FIGURES AND LEGENDS

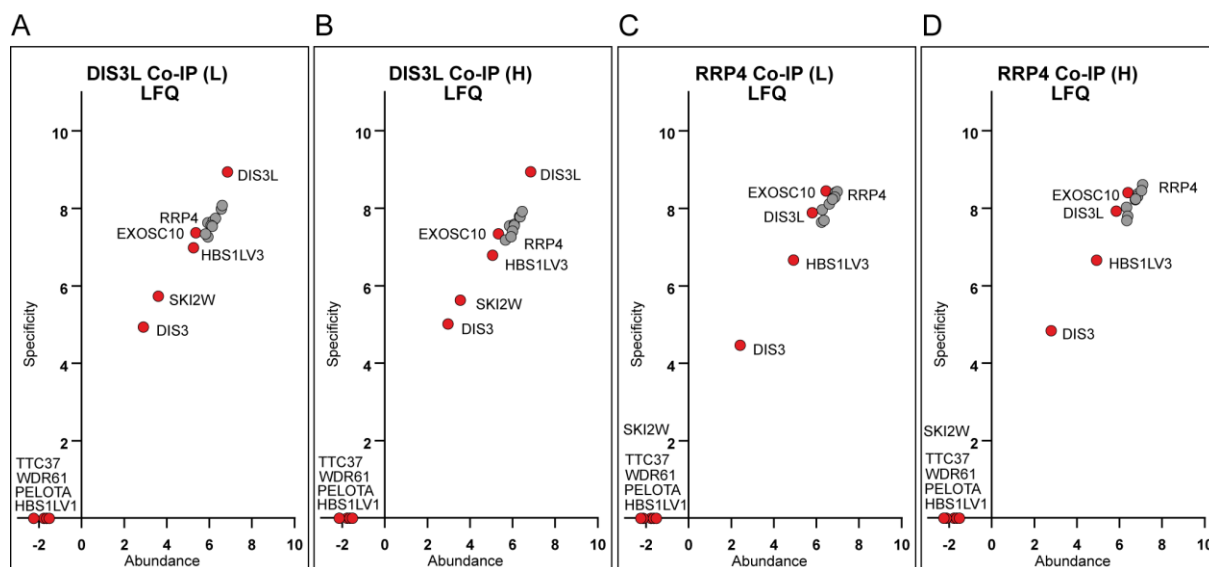

**Figure S1.** The cytoplasmic exosome complex interacts with HBS1LV3. Semiquantitative analysis of Co-IP-MS experiments using EGFP-tagged DIS3L (A and B) or RRP4 (C and D) protein as bait under low salt (L) or high salt (H) washing buffer conditions. No cross-linker was used. Plots presents the exosome and SKI complex subunits identified in Co-IP-MS experiments while other interactors are presented in Figure S2. The exosome core components are coloured grey. Estimated quantities of identified proteins are calculated using the Label Free Quantification (LFQ) algorithm and are represented graphically. LFQ values for proteins were calculated with MaxQuant software using extracted ion currents (XIC) of identified peptides from given proteins. This type of analysis is more suitable for low-intensity proteins/peptides present in measured samples than a spectral counting approach. Protein abundance was calculated as LFQ intensity of the protein signal divided by its molecular weight and shown on the x-axis in a logarithmic scale. Specificity was defined as the ratio of protein LFQ intensity measured in the bait Co-IP to the level of the background (protein LFQ intensity in HEK293 T-REx sample), and shown on the y-axis in a logarithmic scale (log10). DIS3 protein (Figure S1A,B) should be interpreted as a contamination, because it was identified in washing runs, preceding the measured samples.

A

LFQ abundance intensity (Fig. 1 A) Co-IP eGFP-DIS3L; DSP 2mM; 0.5M NaCl wash

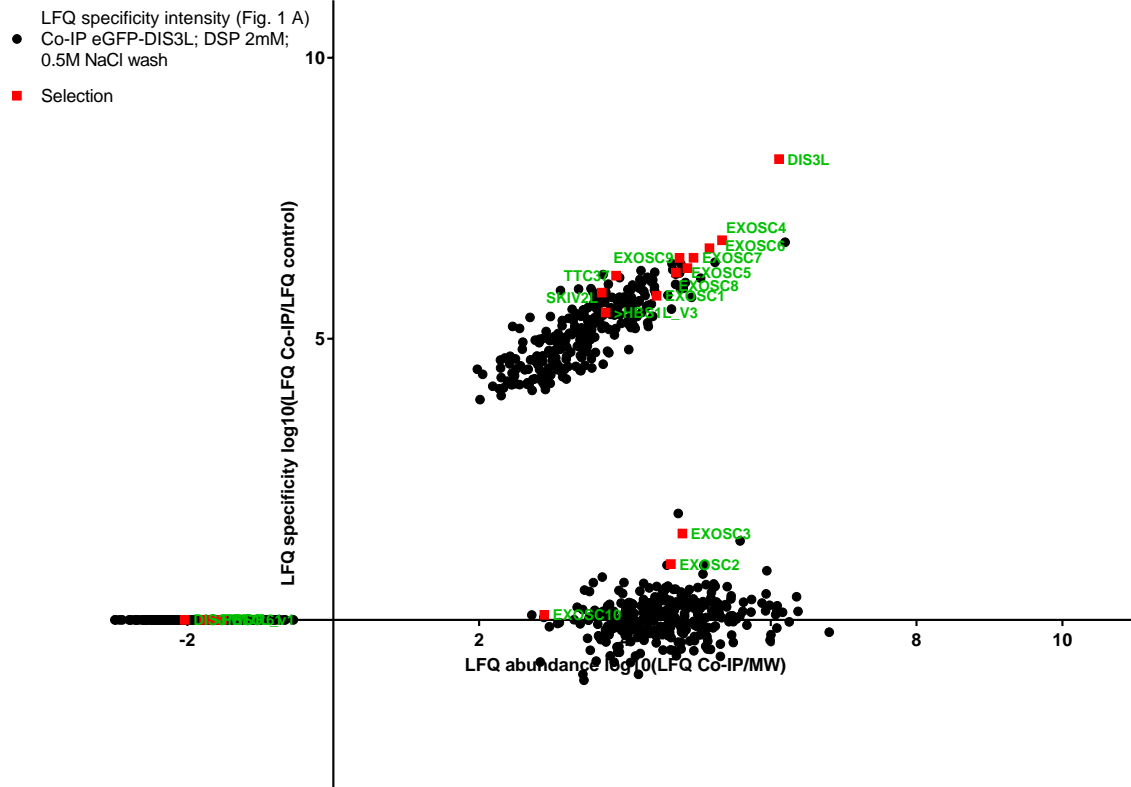

B

LFQ abundance intensity (Fig. 1 B) Co-IP eGFP-RRP4; DSP 2mM; 0.5M NaCl wash

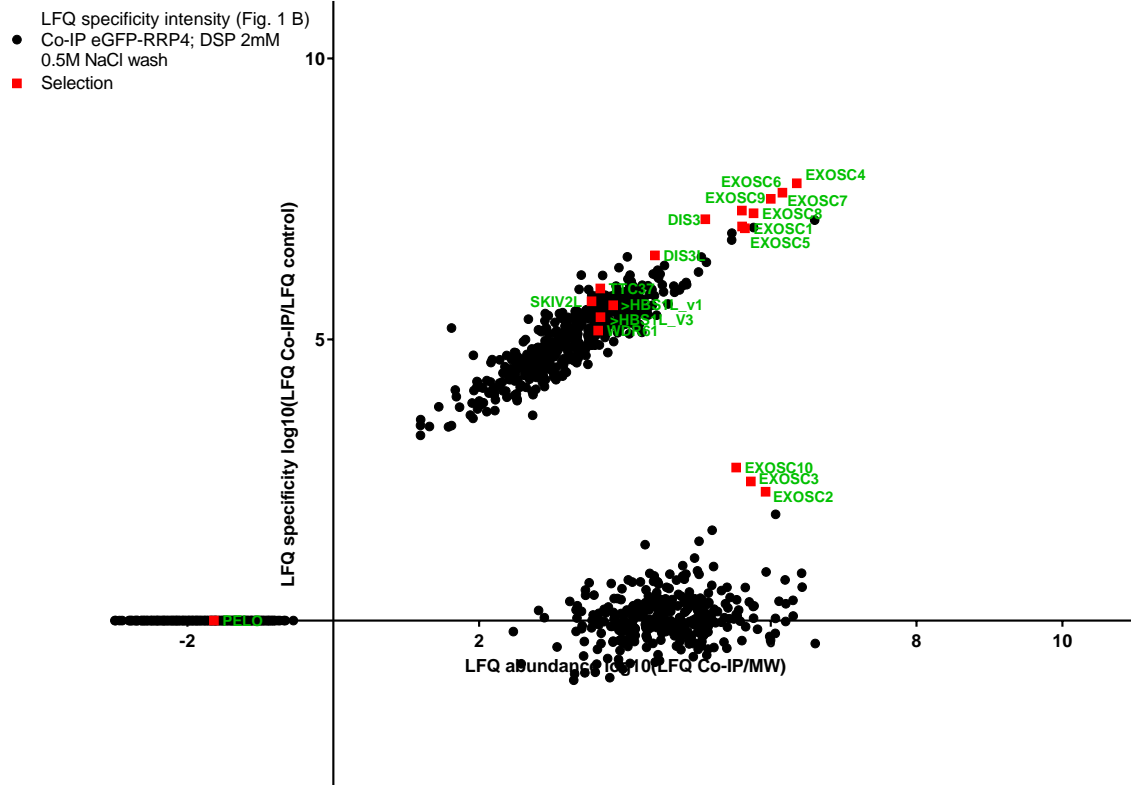

C

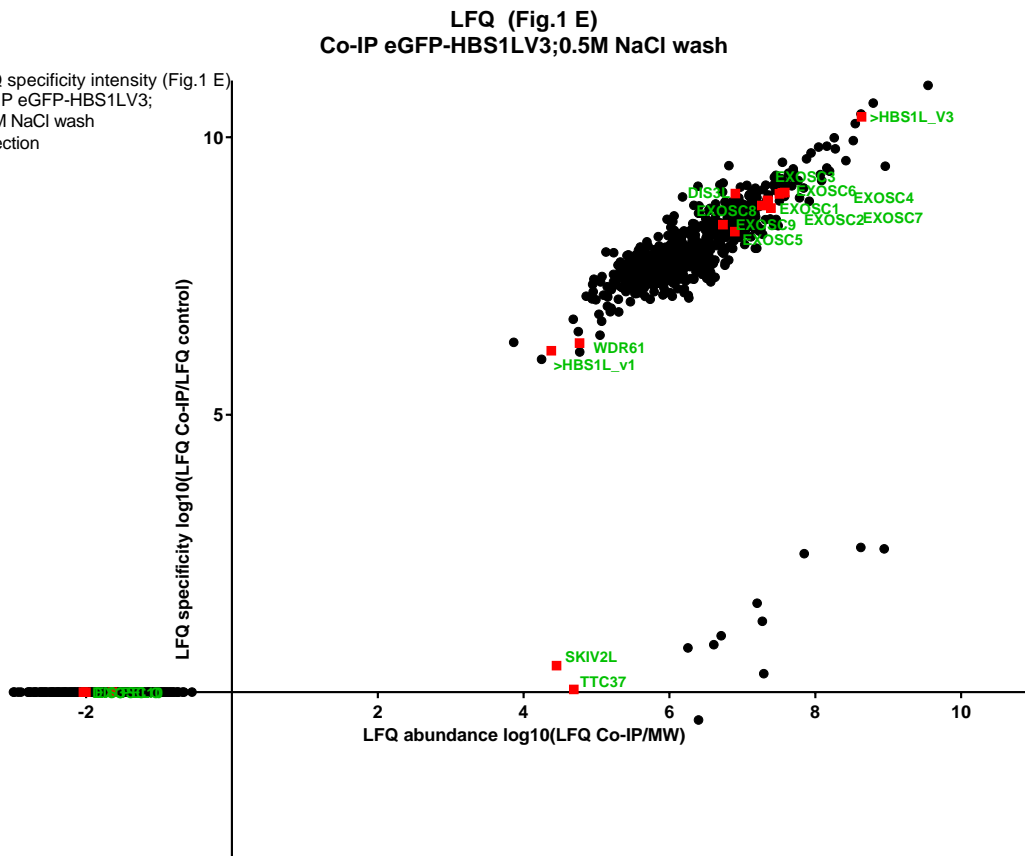

D

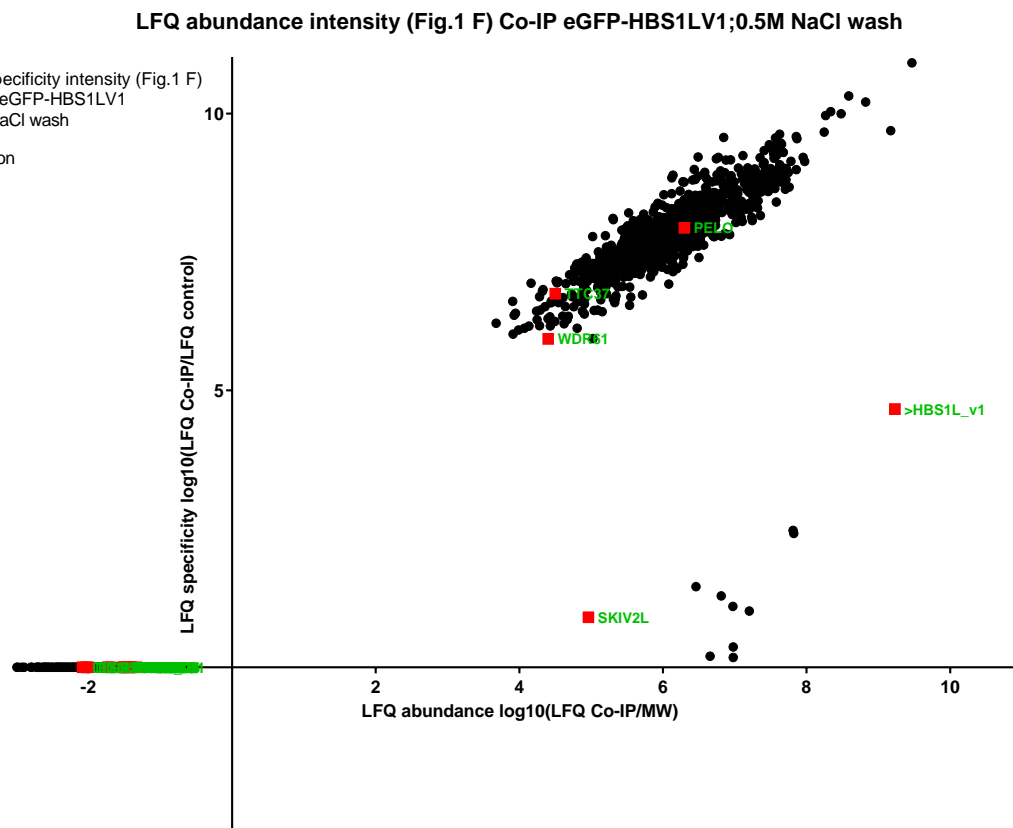

E

LFQ abundance intensity (Fig. S1 A) Co-IP eGFP-DIS3L; 0.1M NaCl wash

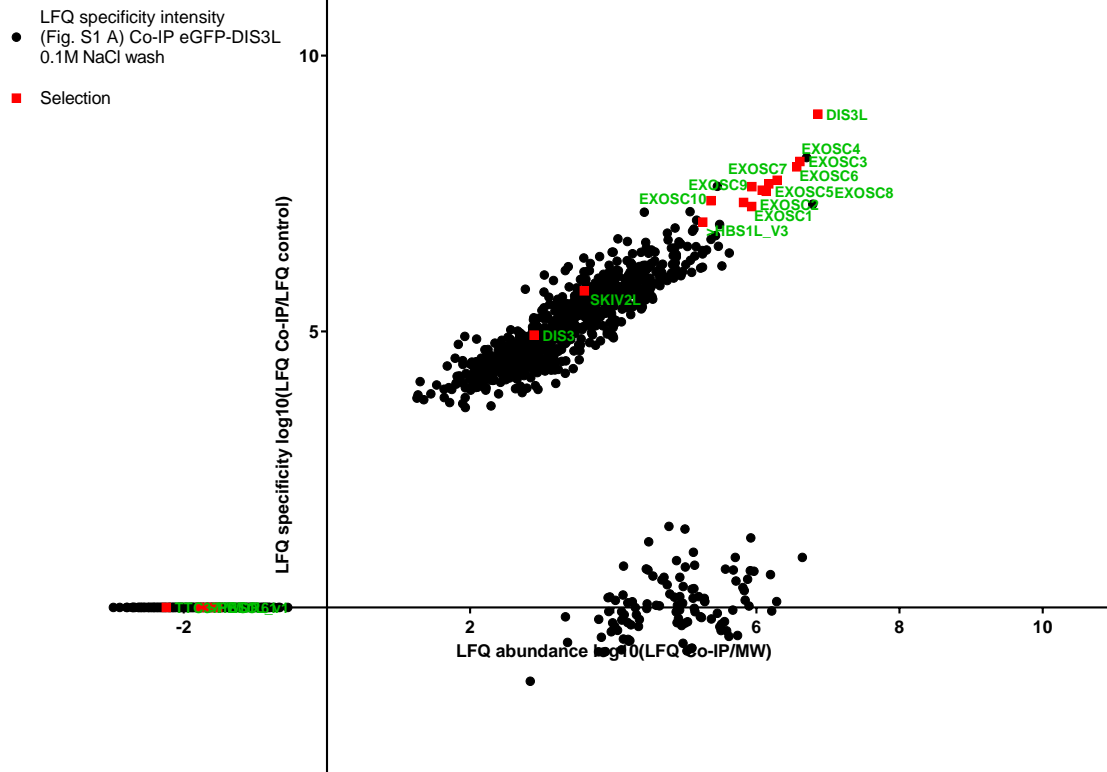

F

LFQ abundance intensity (Fig. S1 B) Co-IP eGFP-DIS3L; 0.5M NaCl wash

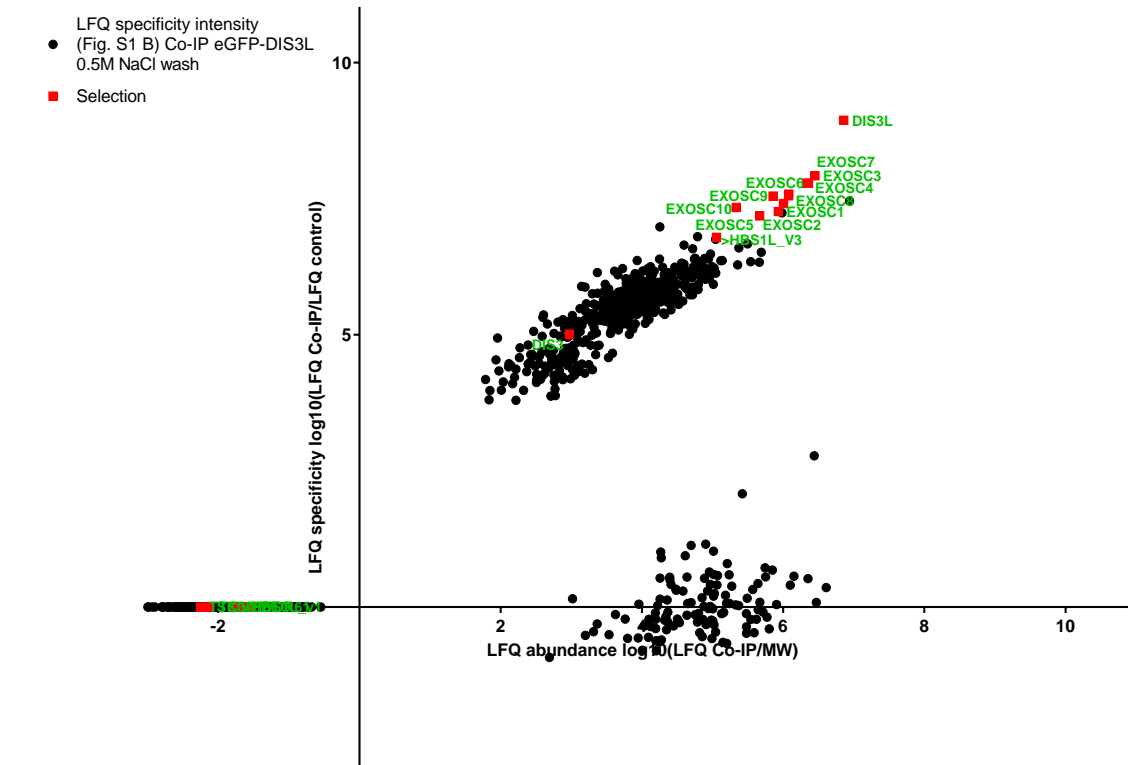

G

LFQ abundance intensity (Fig. S1 C) Co-IP eGFP-RRP4; 0.1M NaCl wash

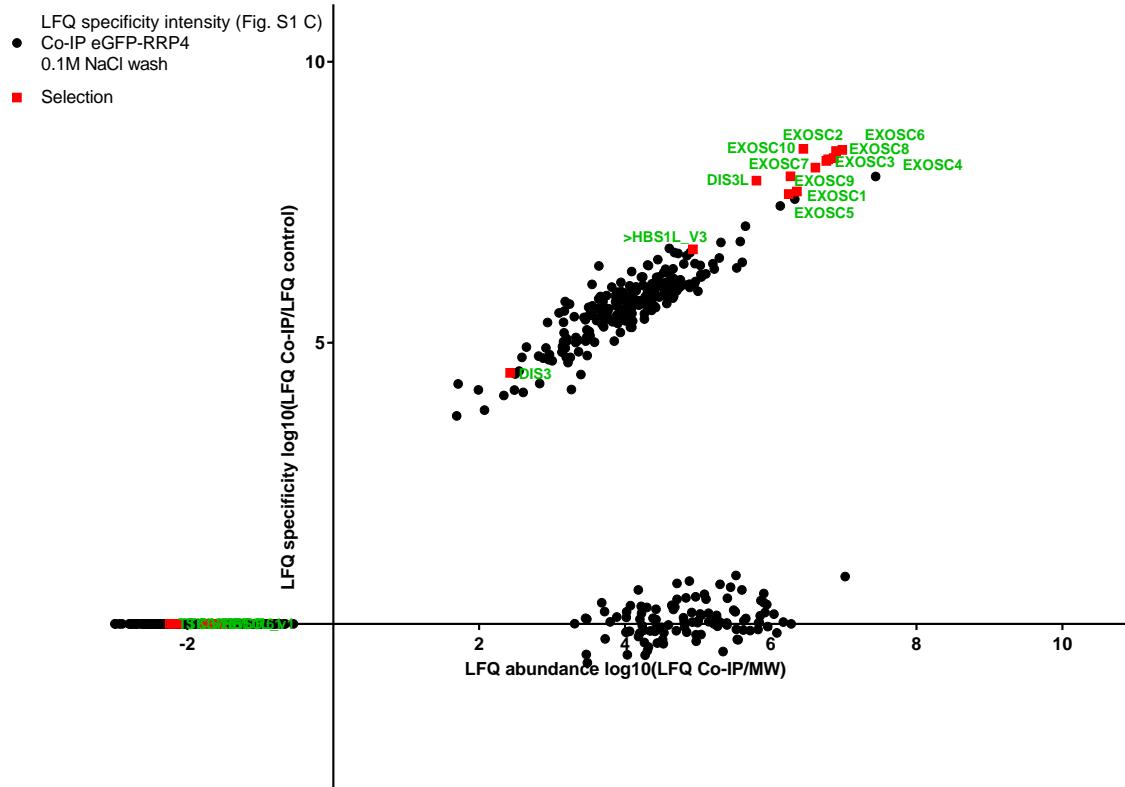

H

LFQ abundance intensity (Fig. S1 D) Co-IP eGFP-RRP4; 0.5M NaCl wash

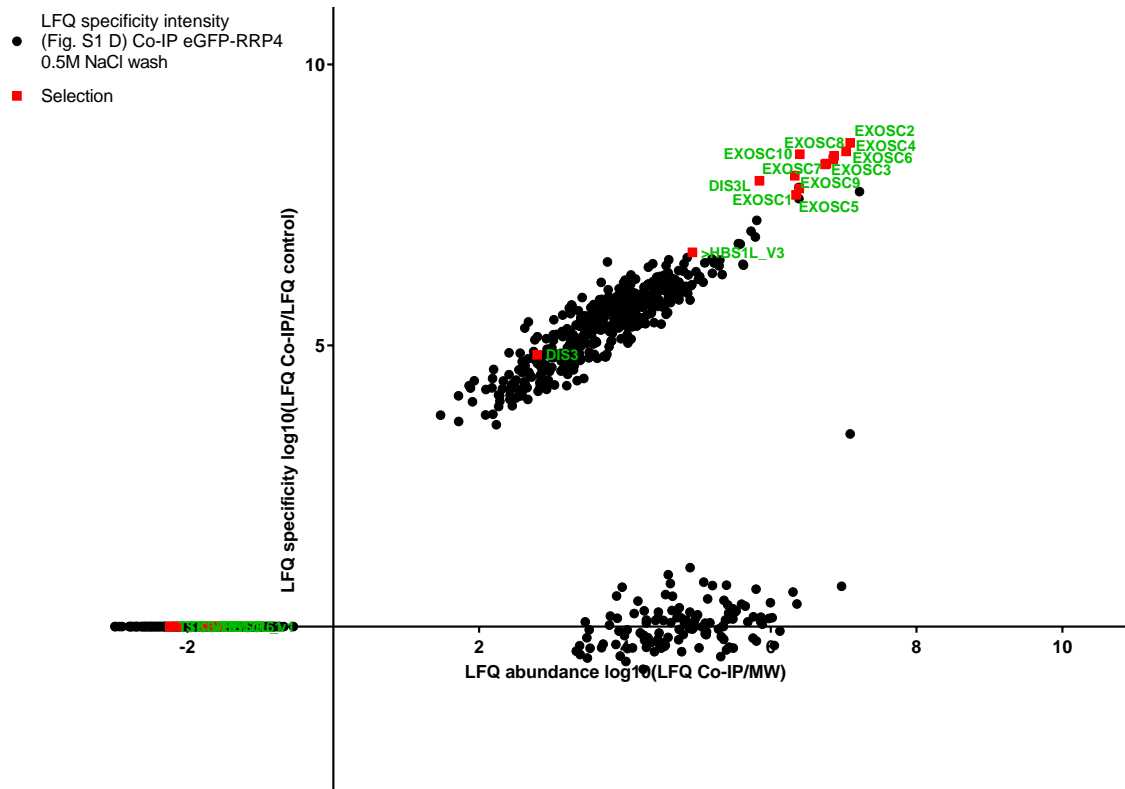

1  
2  
3 **Figure S2.** The cytoplasmic exosome complex interacts with HBS1LV3. The extended version  
4  
5 of results presented in Figure 1A,D,E,F and Figure S2. Semiquantitative analysis of Co-IP-MS  
6  
7 experiments using EGFP-tagged proteins.  
8  
9  
10  
11  
12  
13  
14  
15  
16  
17  
18  
19  
20  
21  
22  
23  
24  
25  
26  
27  
28  
29  
30  
31  
32  
33  
34  
35  
36  
37  
38  
39  
40  
41  
42  
43  
44  
45  
46  
47  
48  
49  
50  
51  
52  
53  
54  
55  
56  
57  
58  
59  
60

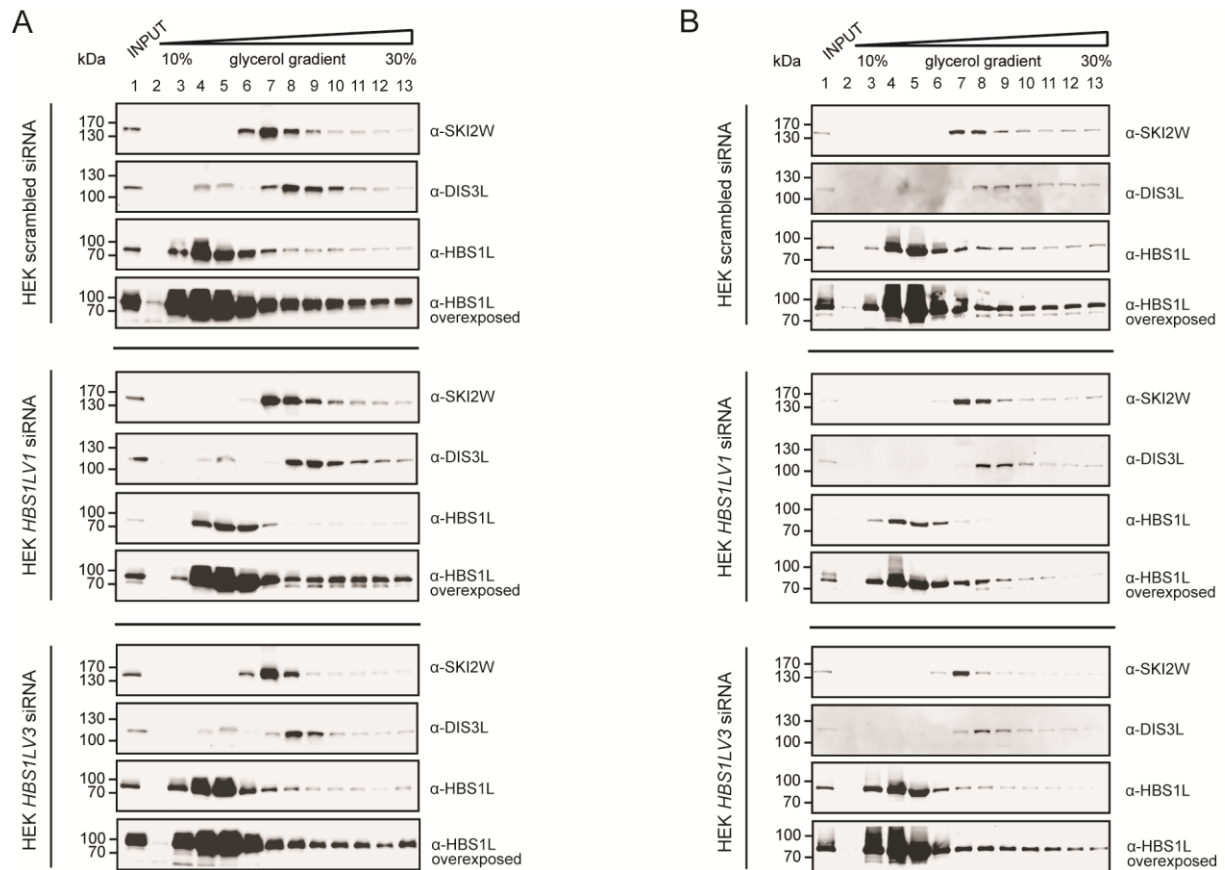

**Figure S3.** Density-based separation of protein complexes by glycerol gradient centrifugation. Protein-protein complexes were separated by glycerol gradient centrifugation. Precipitated proteins were then resolved in SDS-PAGE and analyzed by western blotting.  $\alpha$ -SKI2W,  $\alpha$ -DIS3L and  $\alpha$ -HBS1L antibodies were used. Two independent biological replicates are shown in panels A and B.







Conservation: 9 6 6 9 6 6 66 66 96 66 6 6 9 6 6699666 699666 66

A. chrysaetos canadensis 312 TSTLGKALANAVSHAVNRKNELLENSSSSLVQSRKQESPPSSDMAALPVLRSSTSLADLLQEHQESSASH 381

Z. albicollis 317 GSAIGNLTLDNVSHHTNKNKELLENFSSLAQSRKQESLSSDMAALPVLRSSTSLADLLQEHQESSASH 386

C. picta bellii 338 MSAVGKALDNDINCTQNRKTEHFFENFPFSLQSTKQDISSEMGLPFFSKSGGSPSLADLLQEHQESSSSH 407

C. mydas 320 MSAVRKLAPDNDINSTQNRKTELFENFPFSLQSTRQDISSEMNDLFPFSKSGGSPSLADLLQEHQKSNSSH 389

L. vexillifer 329 TSSLENMAVGNL----NASKMTEVGSVSSVEQSTKNCILKND--ILQFSQCESPSLAELFQEHKKNNSQ 392

D. novemcinctus 331 TSSLENMTLDNL----NAGKKT--GNISLVEQGAKNYISKND--NLHLQSYQESPSLAELFQEHKKNNSQ 392

T. manatus latirostris 332 TSSLENMTLDNL----NASKKTEFESVPLAEQSTKNSIFKND--NLQFSQCESPSLAELFQEHKKNPNQ 395

F. damarensis 326 PSSLENIITLDNL----KPSKTEVGNVSLVEQSAKNYILKND--SLQFSQCESPSLAELFQEHKKNPNQ 389

I. tridecemlineatus 325 SSSLENMTGDNL----NPSKTEVGNVSLVEQSAKNYIFKND--SLQFSQCESPSLAELFQEHKKNHPSQ 388

H. sapiens 327 TSSLENMTVDNL----NASKTEVGNVSLVEQSAKNHTFKND--NLQFSQCESPSLAELFQEHKKNNSQ 390

P. paniscus 327 TSSLENMTVDNL----NASKTEVGNVSLVEQSAKNHTFKND--NLQFSQCESPSLAELFQEHKKNNSQ 390

A. melanoleuca 329 TSSLENRAHDNL----NASEMTEVGNVSLVEQSAKNYILKND--NLQFSQCESPSLAELFQEHKKNNSQ 392

Consensus aa: .Stl.phhhDN.....spKppbh.Nhs.h.QS.Kp...ps-.sL.h.pt.tsSLA-L/QEHPEssssSp

Consensus ss: eehhhh hhhh ehhhh eee hhhhhhh

Conservation: 6 6 6 6 9669 69966699696 6 6 9 699999999966 6 9 66 6999996999

A. chrysaetos canadensis 382 CYS-LTDLYTQSIASLTDMLKGTSPSLQVLSQPQTS CGMPELTGSLSSLSALSVPKIEENLSLSDLIA 450

Z. albicollis 387 CYS-LADLFTQSTASLTDRLKGTSSLSQLVLSQPQTS GGMPELTGSLSSLSALSVEVCPVKIEENLSLSDLIA 455

C. picta bellii 408 CCS-LSDLNQSSTMSFIDLKLGSSPFLSQAQHQAAATGLSELTGSLSSLSALSQASVPRELENLSLSDLIA 476

C. mydas 390 CS--LSDLNQSSTSFIDLKLGSSPFLSQAQHQAAATGMSELTGSLSSLSALSQASVPRELENLSLSDLIA 457

L. vexillifer 393 CST-LSDLNQPASFTDLSLGSFPLSPLANRYQSSSTGISELTGSLSSLSLAFCKASPTRDLENLSLSDLIA 461

D. novemcinctus 393 CFT-LSHLCNPEASFTDLSLGSFPLSPLANRYQSSSTGIPELTGLSSLSLAFCKASVPRDLENLSLSDLIA 461

T. manatus latirostris 396 CFTSSDLNCPSSASFTDLSLGSFPLSPLANRQSSSTGISELTGSLSSLSLAFCKASPTRDLENLSLSDLIA 465

F. damarensis 390 SFN-LSHFCKQPSSFTDLSLGSFPLSPLANRQSSSTGISELTGSLSSLSLAFCKASPTRDLENLSLSDLIA 458

I. tridecemlineatus 389 CFT-LSNLNCQSSASFTDLSLGSFPLSPLANRQSSSTGISELTGSLSSLSLAFCKASPTRDLENLSLSDLIA 457

H. sapiens 391 CFT-LSDLNQSSTSFIDLKLGSSPFLSPLANRQSSSTGISELTGSLSSLSLAFCKASPTRDLENLSLSDLIA 459

P. paniscus 391 CFT-LSDLNQSSTSFIDLKLGSSPFLSPLANRQSSSTGISELTGSLSSLSLAFCKASPTRDLENLSLSDLIA 459

A. melanoleuca 393 CFT-LSDLNQSSTSFIDLKLGSSPFLSPLANRQSSSTGISELTGSLSSLSLAFCKASPTRDLENLSLSDLIA 461

Consensus aa: Ch.o.LhsQsohShTdpLGo.PLSQLhsp.QotsGhsELTGLSSLSLA.h.chtPh+-LENLSLSDLIA

Consensus ss: ee hhhhh hhhhhh hhhhhh hhhhhh hhh hhhhhh

Conservation: 969666 9 6 6 66 6 99999969 6 6 6 6 6 6 666 696 9

A. chrysaetos canadensis 451 ETIEIDKTEQRTDFPMLSVTELR-PSKR--TNIDLSVLVKNADVSAEQNVVRQSNILSPETKLLKKEKQGK 517

Z. albicollis 456 ETIEIDKTEQRTDLPMLSVTELR-PSQG--TNIDLSVLVKSAGVSTKSVAGQSNLSPKMLVKEKQGK 522

C. picta bellii 477 ETIEVDKPEAKDSSRFSAIEMW-PSAGVNTNIDLSVLKKNPEVSAE-AVVRQANTIVPETKVLSSKQGK 544

C. mydas 458 ETIEVDKPEAKDCSRFSIAETW-PSAGVNTNIDLSVLKKNPDVSAE-SVVCQSNITIPETKVLSSKQK 525

L. vexillifer 462 ETIDIDSSQIKKDSVPEPSSSEMRSFGID--SNIDLSVLKAPDF-VPKPVDQVSAIPETKVLSSKLGK 528

D. novemcinctus 462 EAIDVDTSQIKKDSFDPSSFDMRSPGID--SDIDLSVLKAPDF-VPKPVDQVSAIPETKVLSSKLVK 528

T. manatus latirostris 466 ETIDVDKSIKKNDSYKFFSSSEMRSFGID--SNIDLSVLKIKTPDF-VPKPVDQVSAIPETKVLSSKLGK 532

F. damarensis 459 ETIDVNDTQIKKDSVPEPSSSEMRSFGID--SDIDLSVLKSPDF-VTKPRVDQVSAIPETKVLSSKLGK 525

I. tridecemlineatus 458 ETIEVDNSQIKKNSFELSLSETRSPGID--SNIDLSVLKAPDF-VSKPVDQVSAIPETKVLSSKLGK 524

H. sapiens 460 ETIDVDNSQIKKESFEVSLSEVRSPGID--SNIDLSVLKKNPDF-VPKPVDQVSAIPSSRTKVLSSKLGK 526

P. paniscus 460 ETIDVDNSQIKKESFEVSLSEVRSPGID--SNIDLSVLKKNPDF-VPKPVDQVSAIPSSRTKVLSSKLGK 526

A. melanoleuca 462 ETIDIDNSQIKKDSFKLSLSEMKSFGID--SKIDLSVLKIKTPDF-VPKHMVDTSVAPTSGTKVLSSKLGK 528

Consensus aa: ETI-IDpsQb.pD...hSlSEh..Pt.s..osIDLVLKss-h.h.KsIV.QS.h..s.TKllppKbGK

Consensus ss: hhh hh eeeeeehhh eeeee eehhhh

Conservation: 6 669 9 6 666969 999 969999 9999699 9 69969 669696999996

A. chrysaetos canadensis 518 CSGFAKTNKKPRRGLIP-KRQDLSLSWMKALCARPSAFALTCLRYPPKGYKRRRTIGIHKAFLYSRQVQD 586

Z. albicollis 523 GSGFAKANRPPKGGHGLKRQDLSLSWIKALRARPSAFALTCLHYPPKGYKRRRTVGLHKTFLYSRQVQD 592

C. picta bellii 545 NIILVKGKGGKGRIS-KSQDLSLSWMKALCARPSAFALTCLRYPPKGYKRRRTIDHKTFLYSRQVQ 613

C. mydas 526 NIILAKGNKSKKHGHS-KSQDLSLSWMKALCARPSAFALTCLRYPPKGCRRRTIDHKTFLYSRQVQ 594

L. vexillifer 529 SNSSEDNKKNKSGSLT-RKPPFVSWTKAALARPSAFALTCLRYPLKSCRRTLDLYKTFLYSRQVQ 597

D. novemcinctus 529 HSNSTKDKKNKNSGSLT-RKPPFVSWTKAALARPSAFALTCLRYPLKSCRRTLDLYKTFLYSRQVQ 597

T. manatus latirostris 533 NSNSAKDNKKNKSGSLT-RKPPFVSWTKAALARPSAFALTCLRYPPKSCRRTLDLYKTFLYSRQVQ 601

F. damarensis 526 NFSCFKDNKKNKSGSLT-RKPPFVSWTKAALARPSAFALTCLRYPLKSCRRTLDLYKTFLYSRQVQ 594

I. tridecemlineatus 525 NSNSAKDNKKNKSGSLT-RKPPFVSWTKAALARPSAFALTCLRYPLKSCRRTLDLYKTFLYSRQVQ 593

H. sapiens 527 NSNFAKDNKKNKSGSLT-RKPPFVSWTKAALARPSAFALTCLRYPLKSCRRTLDLYKTFLYSRQVQ 595

P. paniscus 527 NSNFAKDNKKNKSGSLT-RKPPFVSWTKAALARPSAFALTCLRYPLKSCRRTLDLYKTFLYSRQVQ 595

A. melanoleuca 529 SFNSAKDNKKNKSGSLT-RKPPFVSWTKAALARPSAFALTCLRYPLKSCRRTLDLYKTFLYSRQVQ 597

Consensus aa: s...hKsNKKspKG.ls.+p.shSLSWKALtARPSAFA.TLCLRY.P.kthKRRTlsl@KTFLYSRQVQ-

Consensus ss: hhhhhhhh hhhhhhhhhhhhhhhhhhhhhhhhhhhhhhhhhhh

Conservation: 9 99 9 6 999999969999969996699996

A. chrysaetos canadensis 587 LKPKETGPIITIPDFDKSASPDDIVKANQKRAFTRQ 623

Z. albicollis 593 VKPKETAPTIAITPFDFKTASPDDIVKANQKRAFTRQ 629

C. picta bellii 614 VKNKESDPLISITPFDFKSASPDDIVKAGQKRAFTR 650

C. mydas 595 VKNKEIGPLISITPFDFKSASPDDIVKAGQKRAFTR 631

L. vexillifer 598 VKDKEISPLIAITPFDFKSASPDDIVKANQKRAFTR 634

D. novemcinctus 598 VKDKEISPLIAITPFDFKSASPDDIVKANQKRAFTR 634

T. manatus latirostris 602 VKDKEISPLIAITPFDFKSASPDDIVKANQKRAFTR 638

F. damarensis 595 VKDKEISPLVAITPFDFKSASPDDIVKANQKRAFTR 631

I. tridecemlineatus 594 VKDKEISPLVAITPFDFKSASPDDIVKANQKRAFTR 630

H. sapiens 596 VKDKEISPLVAITPFDFKSASPDDIVKANQKRAFTR 632

P. paniscus 596 VKDKEISPLVAITPFDFKSASPDDIVKANQKRAFTR 632

A. melanoleuca 598 IKDKEISPLIAITPFDFKSASPDDIVKANQKRAFTR 634

Consensus aa: VKsKEhtPllITPFDFKSASPDDIVKAsQK+AFTRp

Consensus ss: eeee hhhhhh

1  
2  
3 **Figure S4.** Alignment of full-length HBS1LV3 orthologues in vertebrate species. Alignment  
4  
5 and secondary structure predictions were made using the PROfile Multiple Alignment with  
6  
7 predicted Local Structures and 3D constraints (PROMALS3D) tool (1). A conservation index  
8  
9 above 5 is shown in the first line. The lines “consensus aa” and “consensus ss” show consensus  
10  
11 amino acid sequences and consensus predicted secondary structure, respectively. Consensus  
12  
13 predicted secondary structure symbols: h, alpha-helix; e, beta-strand. Consensus amino acid  
14  
15 symbols include: bold and uppercase letters, conserved amino acids; l, aliphatic; @, aromatic;  
16  
17 h, hydrophobic; o, alcohol; p, polar residue; t, tiny; s, small; b, bulky residues; +, positively  
18  
19 charged; -, negatively charged; c, charged.  
20  
21  
22  
23  
24  
25  
26  
27  
28  
29  
30  
31  
32  
33  
34  
35  
36  
37  
38  
39  
40  
41  
42  
43  
44  
45  
46  
47  
48  
49  
50  
51  
52  
53  
54  
55  
56  
57  
58  
59  
60

|                  |                                     |
|------------------|-------------------------------------|
|                  | ALAARPSAFASTLCLRYPLKSC              |
| <b>HMMSTR</b>    | HHHH-HHHHHHHH <del>EEE</del> ---HHH |
| <b>sspro4</b>    | HHH---HHHHHHHH-----HHH              |
| <b>jnet</b>      | -----HHHHHHHH-----                  |
| <b>proteus</b>   | -----HHHHHHHH-----                  |
| <b>*SPARROW</b>  | -----HHHHHHHH-----                  |
| <b>SPARROW</b>   | HH---HHHHHHHH-----H                 |
| <b>raptorxss</b> | H---HHHHHH-----                     |
| <b>psspred</b>   | -E---HHHHHHHH-----                  |
| <b>spineX</b>    | HHH--HHHHHHHHHH-----                |
| <b>spine</b>     | HHH--HHHHHHHHHH-----HHH             |
| <b>psipred</b>   | HH---HHHHHHHH-----                  |
| <b>soprano</b>   | HHH--HHHHHHHHHH-----                |
| <b>consensus</b> | HH---HHHHHHHH-----                  |

**Figure S5.** HBS1LV3 helix secondary structure predictions by GeneSilico protein structure prediction meta-server (2). Servers and predictions are listed. Symbols: H, alpha-helix; E, beta-strand.

A

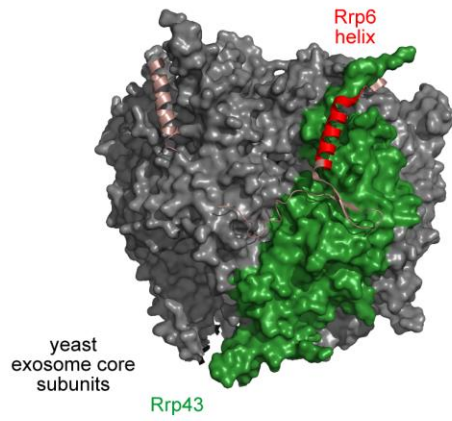

B

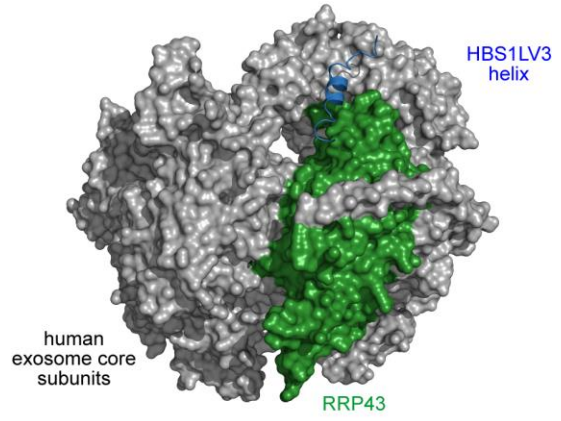

C

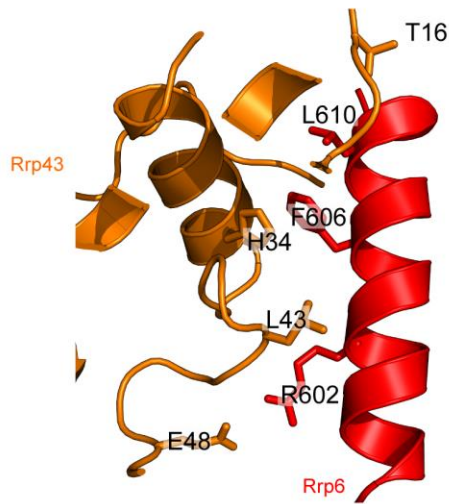

D

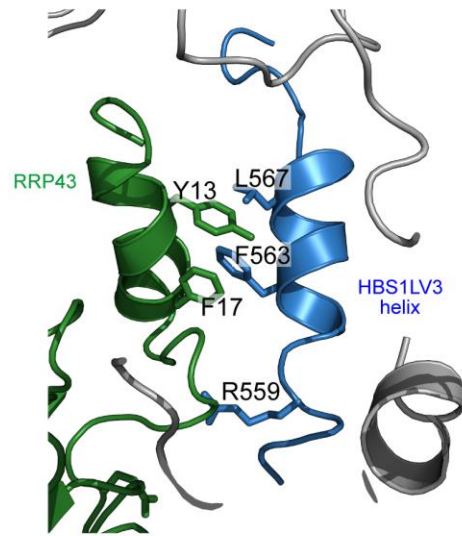

E

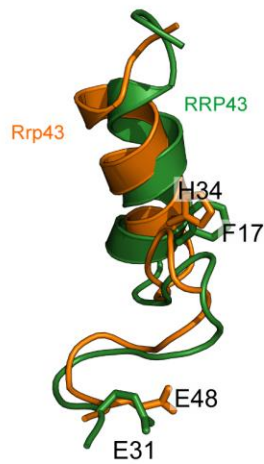

Rrp43 25 I-SPELSLQRHLSLGI**R**PCL**R**KYEE**F** 49  
RRP43 7 TVE**P**LEY**Y**R**F**LK**E**NC**R**PD**G**REL**G**E**F** 32  
          \*      :\*. . . \*\*      \*:      \*\*

F

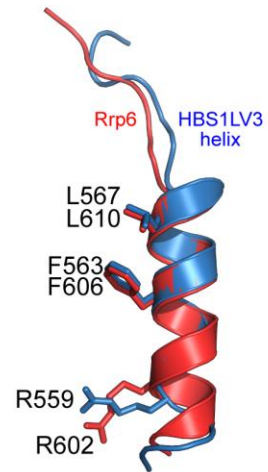

Rrp6 helix 598 DIR**I**RA**Q**N**F**K**S**ALANLE**D**I**E**I**F**E 619  
HBS1LV3 helix 555 ALA**R**PS**A**FA**S**T**L**CL**R**Y**P**L**K**S**C** 576  
                                  :      \*..\*.\*.\*      :

1  
2  
3 **Figure S6.** Models of exosome interactions. Modeled human HBS1LV3 helix docked into the  
4 exosome core (B) and magnified view (D) are shown. RRP43 protein and HBS1LV3 helix are  
5 shown in green and blue, respectively. The remainder of the human exosome complex is  
6 coloured grey. Yeast Rrp43-Rrp6 (A) and magnified view (C) are shown (PDB code: 4IFD,  
7 (3)). Side chains of the major amino acids involved in the interaction are shown in stick  
8 representation. Rrp43 and Rrp6 proteins are coloured orange and red, respectively. (E)  
9 Comparison between human RRP43 and yeast Rrp43. Side chains of the indicated amino acids  
10 are shown in stick representation. Multiple sequence alignment of presented structure fragments  
11 is shown. The human RRP43 and yeast Rrp43 proteins are shown in green and orange,  
12 respectively. (F) Comparison between human HBS1LV3 helix and yeast Rrp43 helix. Side  
13 chains of the indicated amino acids are shown in stick representation. Multiple sequence  
14 alignment of presented structure fragments is shown. The human HBS1LV3 helix and yeast  
15 Rrp6 helix are shown in blue and red, respectively.  
16  
17  
18  
19  
20  
21  
22  
23  
24  
25  
26  
27  
28  
29  
30  
31  
32  
33  
34  
35  
36  
37  
38  
39  
40  
41  
42  
43  
44  
45  
46  
47  
48  
49  
50  
51  
52  
53  
54  
55  
56  
57  
58  
59  
60



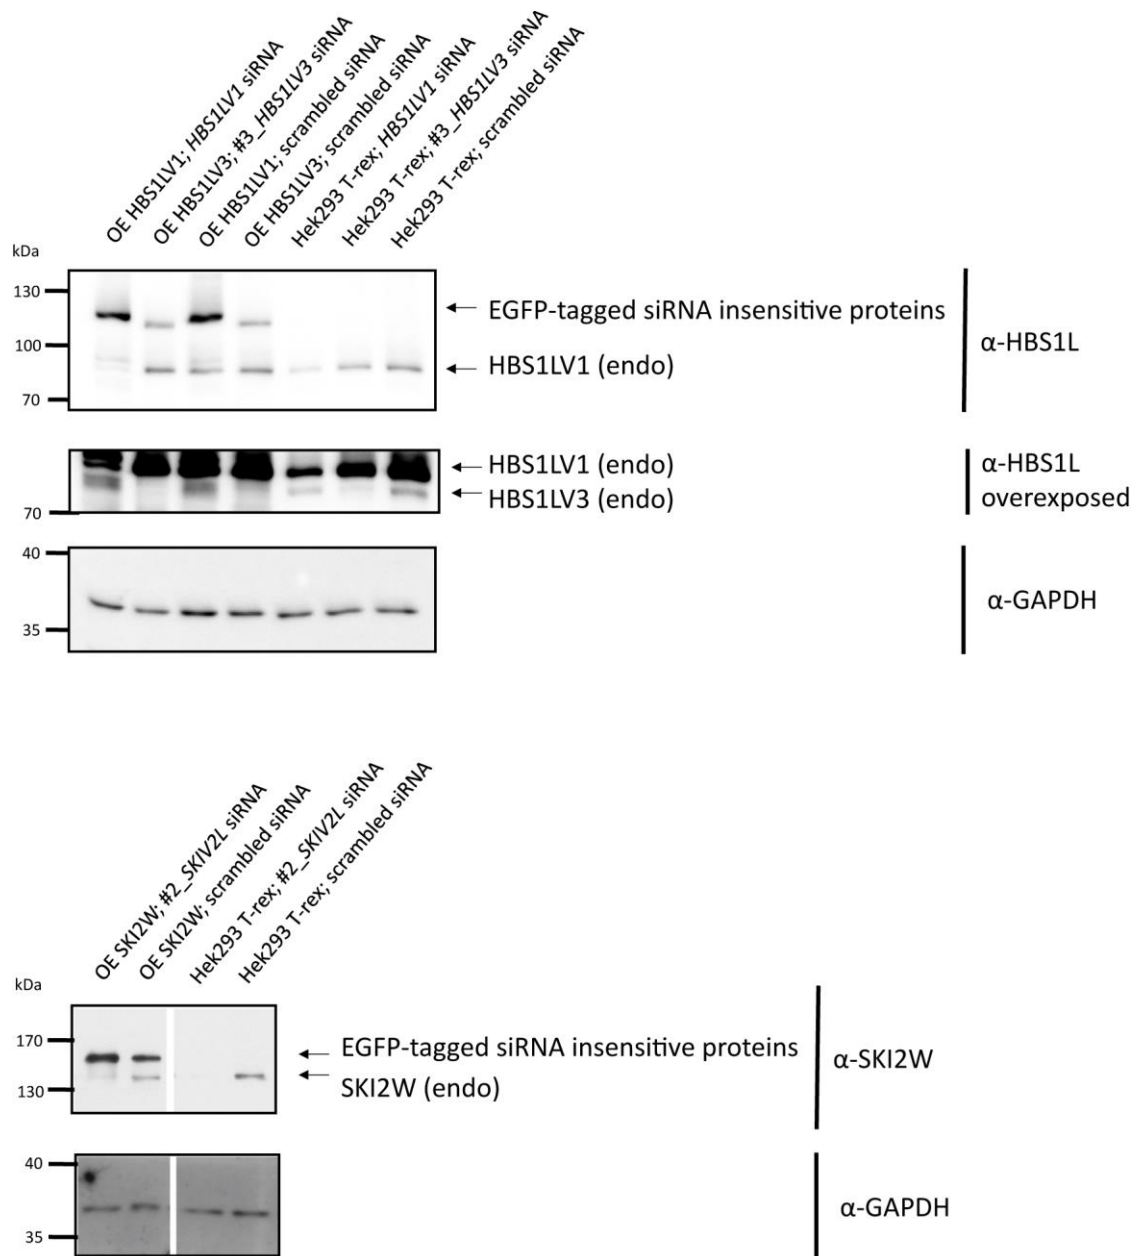

**Figure S7.** Western blot showing the levels of endogenous and EGFP-tagged HBS1LV1, HBS1LV3 and SKI2W proteins in HEK293 cells. siRNAs specific to HBS1LV1 or HBS1LV3 or SKIV2L were used, as indicated above the lanes. Proteins were analyzed using antibodies against the SKI2W protein, the N-terminus of the HBS1L or GAPDH (loading control). Positions of the endogenous and EGFP-tagged proteins are indicated with arrows. The ratio of endogenous:EGFP-tagged form is visible for HBS1L and SKI2W proteins.

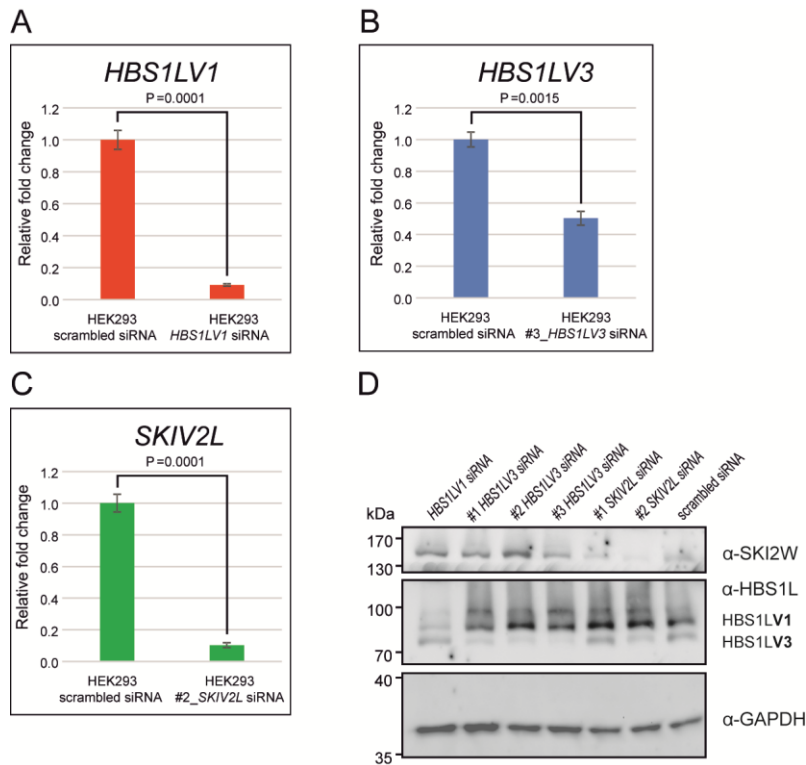

**Figure S8.** Decrease in mRNA and protein levels upon siRNA-mediated silencing of gene expression. Real-Time Quantitative PCR showing *HBS1LV1*, *HBS1LV3* and *SKIV2L* transcript levels (A, B and C, respectively) after siRNA-mediated silencing of gene expression. *XIST* and *MALAT1* lncRNA were used for normalization, because RNA-seq data indicated that the levels of these two transcripts were unaffected. Error bars represent SEM (n = 3). *p*-value obtained using *t*-test is shown. (D) Western blot showing downregulation of protein levels upon siRNA transfection of HEK293 cell lines. Different siRNA specific to mRNA coding for HBS1L, HBS1LV3 (#1, #2, #3) or SKI2W (#1, #2) were tested. Total cell extracts were prepared 48 hours post-transfection and proteins were analyzed using  $\alpha$ -SKI2W,  $\alpha$ -HBS1L and  $\alpha$ -GAPDH (loading control) antibodies.

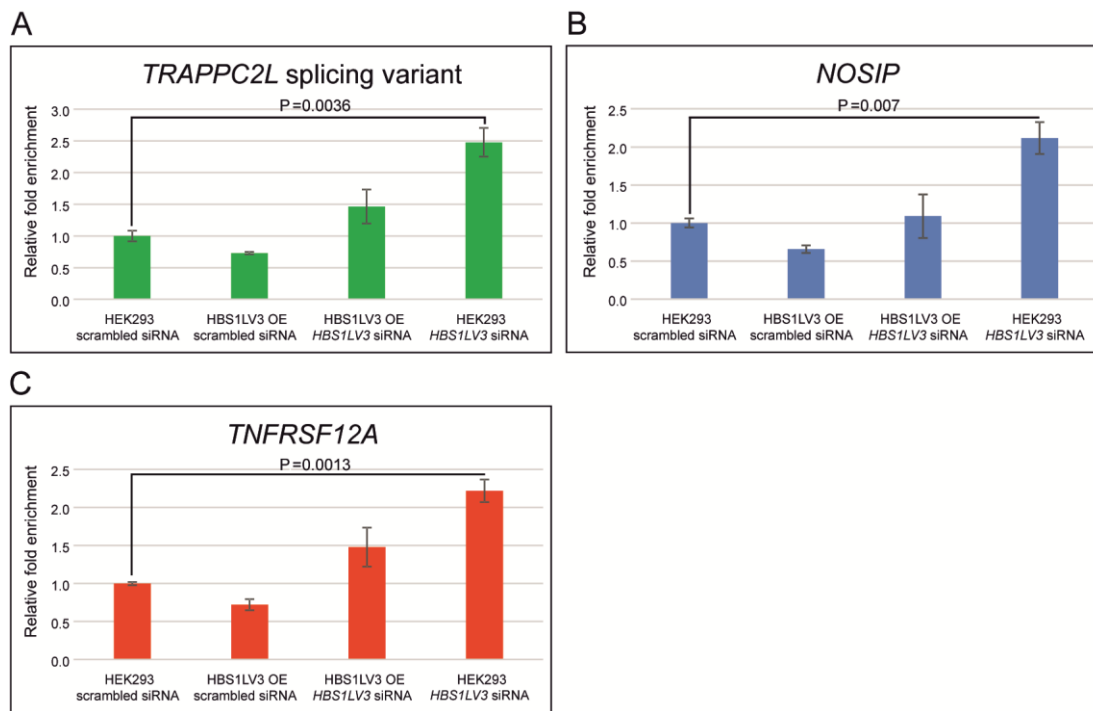

**Figure S9.** HBS1LV3 depletion leads to increased steady-state levels of mRNA. RNA-seq experiments were validated by Real-Time Quantitative PCR (qPCR). Relative fold-enrichment of three selected transcripts (A) *TRAPPC2L* splicing variant, (B) *NOSIP* and (C) *TNFRSF12A* was measured. *XIST* and *MALAT1* lncRNA were used for normalization, because RNA-seq data indicated that the levels of these two transcripts were unaffected. Error bar represents SEM (n = 3); OE – EGFP-tagged protein production. *p*-value obtained using *t*-test is shown.



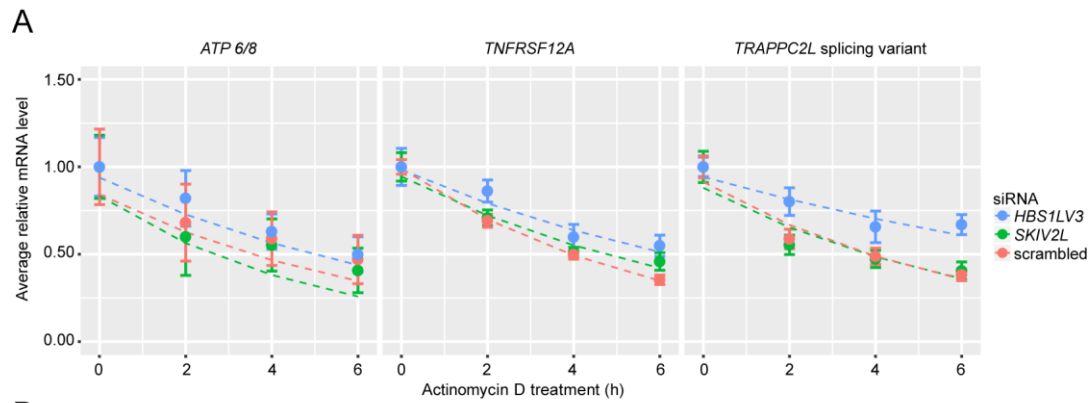

**B**

| transcript                          | stabilization factor:<br>scrambled siRNA vs.<br><i>SKIV2L</i> siRNA | stabilization factor:<br>scrambled siRNA vs.<br><i>HBS1LV3</i> siRNA |
|-------------------------------------|---------------------------------------------------------------------|----------------------------------------------------------------------|
| <i>mtATP 6/8</i>                    | 1.110                                                               | 1.167                                                                |
| <i>NOSIP</i>                        | 2.016                                                               | 5.493                                                                |
| <i>TNFRSF12A</i>                    | 1.347                                                               | 1.869                                                                |
| <i>TRAPPC2L</i><br>splicing variant | 1.152                                                               | 2.424                                                                |

**Figure S10.** HBS1LV3 depletion leads to an increase in mRNA half-life. (A) Average relative mRNA level (y-axis) of *ATP 6/8* (mitochondrial transcript, negative control), *TRAPPC2L* splicing variant and *TNFRSF12A*. mRNA was measured by Real-Time qPCR following 0, 2, 4 and 6 hour actinomycin D treatment. *GAPDH* mRNA was used for normalization. Error bar represents SEM ( $n = 5$ ) (5 biological replicates). Dashed lines represent exponential decay fits. (B) mRNA stabilization factors.

## SUPPLEMENTARY FILES

- Mass Spectrometry data: Dataset S1.xlsx

## SUPPLEMENTARY METHODS

### Generation of vectors used for stable and transient transfection of human cell lines

To determine how many *HBS1L* splicing variants are present in human cells, we performed a cloning procedure following reverse transcription. Using HEK293 cDNA as a template we successfully amplified and sequenced transcripts coding for HBS1LV1 (the canonical HBS1L protein) and HBS1LV3 (the short, Ski7-like variant).

A cloning procedure to generate plasmids expressing full, truncated and mutated variants of proteins with an EGFP epitope at the N- terminus was as follows. First, inserts containing ORF coding for the protein of interest were amplified with suitable primer pairs (Table S1) using cDNA as a template and Phusion DNA Polymerase (Thermo Scientific) according to the manufacturer's protocol. Primers were designed using Clone Manager Professional 9 (Sci-Ed Software) and primer specificity was tested with Primer-BLAST (<http://www.ncbi.nlm.nih.gov/tools/primer-blast/>). Primers contained overhangs required for subsequent Sequence and Ligase Independent Cloning (SLIC) procedures. Inserts were then cloned into the *NheI*/*AgeI* enzyme sites in pcDNA5/FRT/TO P2 vectors to obtain N- terminal tagged proteins, respectively, using SLIC (4). The constructed plasmids were then introduced into the *E. coli* MH1 strain (*araD lacX74 galU hsdR hsdM rpsL*) by transformation. Inserts were then sequenced.

To prepare constructs exogenously expressing *HBS1L*, *HBS1LV3* and *SKIV2L* transcripts that were insensitive to siRNA, we recoded the following sequences:

1  
2  
3 436 – 456 of the *HBS1L* ORF (insensitivity to *HBS1LV1* siRNA)  
4  
5

6 ***HBS1LV1* siRNA**  
7 HBS1L CCAGTAGATCCCAGACATCG 456  
8 HBS1Lrec CCTGTCGACTCGCAAAC TAGT 456  
9 \*\* \* \* \* \* \* \* \* \*  
10 P V D T Q T S

11 1240 – 1260 of the *HBS1LV3* ORF (insensitivity to #1 *HBS1LV3* siRNA)  
12  
13

14 **#1 *HBS1LV3* siRNA**  
15 HBS1LV3 CCCCTGT CACAATTAGCAAAT 1260  
16 HBS1LV3rec CCACTCAGTCAGCTAGCTAAC 1260  
17 \*\* \* \* \* \* \* \* \* \*  
18 P L S Q L A N

19  
20  
21 1308 -1328 of the *HBS1LV3* ORF (insensitivity to #2 *HBS1LV3* siRNA)  
22  
23

24 **#2 *HBS1LV3* siRNA**  
25 HBS1LV3 TCGTCATTGGCATTTCATAAA 1328  
26 HBS1LV3rec AGTAGCTTTGCTTCCACAAG 1328  
27 \* \* \* \* \* \* \* \*  
28 S S L A F H K

29  
30  
31  
32 1314 – 1334 of the *HBS1LV3* ORF (insensitivity to #3 *HBS1LV3* siRNA)  
33  
34

35 **#3 *HBS1LV3* siRNA**  
36 HBS1LV3 TTGGCATTTCATAAAGCTTCT 1334  
37 HBS1LV3rec CTTGCTTTCACAAGGCTCC 1334  
38 \* \* \* \* \* \* \* \*  
39 L A F H K A S

40  
41  
42 523 – 543 of the *SKIV2L* ORF (insensitivity to #1 *SKIV2L* siRNA)  
43  
44

45 **#1 *SKIV2L* siRNA**  
46 SKIV2L GAGGAGATAGACTTTGAGAAA 543  
47 SKIV2Lrec GAAGAAATCGATTTGAAAAG 543  
48 \*\* \* \* \* \* \* \* \* \*  
49 E E I D F E K

50  
51  
52 628 – 648 of the *SKIV2L* ORF (insensitivity to #2 *SKIV2L* siRNA)  
53  
54

55 **#2 *SKIV2L* siRNA**  
56 SKIV2L AGCCTTAGCTGTATGTTGGAG 648  
57 SKIV2Lrec TCCTTGTCATGCATGCTTGAA 648  
58 \* \* \* \* \* \* \* \*  
59 S L S C M L E  
60

1  
2  
3 The presence of the recoded fragment was verified by digestion with restriction endonucleases  
4  
5 (recoded sequences contained sites recognized by restriction endonucleases) and sequencing.  
6  
7  
8  
9

### 10 **Preparation of RNA-seq libraries**

11  
12  
13  
14 RNA-seq libraries were prepared as described previously (5).  
15  
16  
17  
18  
19

### 20 **SUPPLEMENTARY REFERENCES**

- 21  
22  
23 1. Pei,J., Kim,B.-H. and Grishin,N.V. (2008) PROMALS3D: a tool for multiple protein  
24 sequence and structure alignments. *Nucleic Acids Res.*, **36**, 2295–2300.  
25  
26 2. Kurowski,M.A. and Bujnicki,J.M. (2003) GeneSilico protein structure prediction meta-  
27 server. *Nucleic Acids Res.*, **31**, 3305–3307.  
28  
29 3. Makino,D.L., Baumgärtner,M. and Conti,E. (2013) Crystal structure of an RNA-bound 11-  
30 subunit eukaryotic exosome complex. *Nature*, **495**, 70–75.  
31  
32 4. Li,M.Z. and Elledge,S.J. (2007) Harnessing homologous recombination in vitro to generate  
33 recombinant DNA via SLIC. *Nat. Methods*, **4**, 251–256.  
34  
35 5. Szczepińska,T., Kalisiak,K., Tomecki,R., Labno,A., Borowski,L.S., Kulinski,T.M.,  
36 Adamska,D., Kosinska,J. and Dziembowski,A. (2015) DIS3 shapes the RNA  
37 polymerase II transcriptome in humans by degrading a variety of unwanted transcripts.  
38 *Genome Res.*, **25**, 1622–1633.  
39  
40  
41  
42  
43  
44  
45  
46  
47  
48  
49  
50  
51  
52  
53  
54  
55  
56  
57  
58  
59  
60
